1 **Notch Regulates Vascular Collagen IV Basement Membrane Through Modulation of Lysyl**  
2 **Hydroxylase 3 Trafficking**  
3  
4  
5  
6

7 Stephen J. Gross<sup>1</sup>; Amelia M. Webb<sup>1</sup>, Alek D. Peterlin<sup>1</sup>; Jessica R. Durrant<sup>2</sup>, Rachel Judson<sup>1</sup>,  
8 Erich J. Kushner\*<sup>1</sup>.  
9

10  
11  
12 <sup>1</sup>Department of Biological Sciences, University of Denver, Denver, CO

13 <sup>2</sup>HistoTox Labs, Boulder, CO  
14  
15  
16

17 \*Author for correspondence: Erich Kushner  
18 University of Denver  
19 Department of Biological Sciences  
20 Denver, CO 80210  
21 Phone: 303-871-4386  
22 Email: Erich.Kushner@du.edu  
23  
24  
25  
26

27 **Summary:** 1,381 characters (*including spaces*)  
28

29 **Manuscript:** 46,720 characters (*including spaces and main fig legends*)  
30

31 **Figures:** 6  
32

33 **Supplemental Materials:** 6 Figures and Legends, Supplemental Experimental Procedures  
34

35 **Running Title:** Vascular Notch promotes Collagen IV trafficking  
36

37 **Keywords:** Notch, Angiogenesis, Blood vessel, Zebrafish, Development, Collagen IV, Rab10,  
38 Rab25, Lysyl hydroxylase 3, Trafficking, Secretion  
39  
40  
41  
42  
43  
44  
45  
46  
47  
48  
49  
50

## 51 SUMMARY

52 During angiogenesis, endothelial cells secrete proteins that make up a planar protein  
53 network surrounding blood vessels termed basement membrane (BM). Collagen type IV (Col IV)  
54 is a BM protein associated with early blood vessel morphogenesis and is essential for blood  
55 vessel stability. To date, little is known about how endothelial cells mediate intracellular  
56 transport and selective secretion of Col IV. We have identified the GTPase Rab10 as a major  
57 regulator of Col IV vesicular trafficking during vascular development. Knockdown of Rab10  
58 reduced *de novo* Col IV secretion *in vivo* and *in vitro*. Mechanistically, we determined that  
59 Rab10 is an indirect mediator of Col IV secretion, partnering with atypical Rab25 to deliver the  
60 enzyme lysyl hydroxylase 3 (LH3) to Col IV-containing vesicles staged for secretion. Loss of  
61 Rab10 or Rab25 resulted in depletion of LH3 from Col IV-containing vesicles and rapid  
62 lysosomal degradation of Col IV. Furthermore, we demonstrated that Rab10 activation is  
63 downstream of Notch signaling, indicating a novel connection between permissive Notch-based  
64 vessel maturation programs and vesicle trafficking. Overall, our results illustrate both a new  
65 trafficking-based component in the regulated secretion of Col IV and how this vesicle trafficking  
66 program interfaces with Notch signaling to fine-tune BM secretion during blood vessel  
67 development.

## 68 INTRODUCTION

69 Endothelial cells (ECs) are the cell type responsible for the bulk of embryonic blood  
70 vessel formation, eventually leading to an estimated 50,000 miles of vasculature by  
71 adulthood[1]. During development, new blood vessels emerge from pre-existing vasculature, a  
72 process termed angiogenesis [1-3]. During angiogenesis, ECs secrete a variety of proteins  
73 composing a planar protein network that encapsulates blood vessels, collectively termed  
74 basement membrane (BM). The bulk of the vascular BM is secreted during the angiogenic  
75 stages of development by ECs and later buttressed with mural cell interactions[4]. The BM not  
76 only provides a 50-200 nm thick static planar protein network on which ECs reside, but  
77 constitutes a dynamic and diverse extracellular environment vital to blood vessel integrity[5, 6].  
78 The perivascular BM elements vary depending on anatomical location[7], but generally  
79 demonstrate an enrichment of macromolecular collagen IV (Col IV), laminins (4-1-1 and 5-1-1),  
80 perlecan, fibronectin and nidogen[4, 8] that are directly secreted by ECs[9] and supportive cells  
81 [9-11]. For instance, laminins are anchored to Col IV by cross-linking of perlecan and nidogen,  
82 creating an exceptionally resilient co-polymer[12, 13]. In the absence of Col IV, BM integrity and  
83 cell integrin signaling are greatly diminished[14, 15]. In sprouting angiogenesis, ECs break down  
84 existing BM while simultaneously secreting it. How ECs orchestrate this feat, blending cell-  
85 autonomous signaling with tissue-level communication, is unclear and represents a void in our  
86 understanding of blood vessel development.

87 Blood vessels are exquisitely dependent on Col IV BM due their inherent pressure  
88 demands as a fluid transport system. Disruption in Col IV bioavailability during blood vessel  
89 development is the basis of small vessel disease (SVD) in which Col IV point mutations promote  
90 intracellular retention or degradation of Col IV, limiting its perivascular deposition. This reduced  
91 Col IV secretion in SVD is associated with a clinical sequela like intracerebral hemorrhage,  
92 typically resulting in death or profound disability[16]. Genetic ablation of Col IV in mice does not  
93 prevent angiogenesis, *per se*, but is embryonically lethal due to an inability to resist the  
94 mechanical strain of blood circulation and resulting vessel rupture[15]. Col IV itself is an obligate  
95 heterotrimer made of 3 alpha chains forming a long triple helix[17]. Trimer formation is, in part,  
96 achieved through lysyl hydroxylase (LH) 1-3 (genes Procollagen-Lysine, 2-Oxoglutarate 5-  
97 Dioxygenase (PLOD1,2,3)) that catalyze hydroxylysine formation, without which stable  
98 heterotrimer formation is abolished. LH1 and LH2 are restricted to the endoplasmic reticulum  
99 (ER). LH3 demonstrates an affinity for Col IV over other collagen subtypes and is found both in  
100

101 the ER and on post-Golgi vesicles[18]. Indeed, Col IV homeostasis is important for both blood  
102 vessel development and maintenance.

103 Akin to transcriptional networks, vesicular trafficking programs are complex and likely  
104 comprised of unique organotypic signatures that are fundamental to tissue form and function. In  
105 terms of Col IV, how Col IV is transported, targeted to the basal membrane, interfaces with  
106 degradative organelles or intersects with other proteins/enzymes during angiogenesis is mostly  
107 unknown. Moreover, it is well characterized that permissive programs, such as Notch  
108 signaling[19] are indispensable for blood vessel maturation and stability. Taken in aggregate,  
109 how blood vessel maturation signaling initiates crosstalk with trafficking regulators, such as  
110 those involved in Col IV secretion, is also a major void in our understanding of BM regulation  
111 during angiogenesis.

112 Here, we describe a novel level of Col IV regulation that leverages vesicular transport to  
113 precisely modulate Col IV secretion in ECs during blood vessel development. Specifically, we  
114 demonstrate that Rab10 and Rab25 GTPases govern the transport and fusion of LH3 to Col IV  
115 vesicles staged for secretion. In the absence or inactivation of Rab10 or Rab25, LH3 trafficking  
116 is halted and Col IV secretion is abolished. Additionally, we demonstrate a first of its kind  
117 connection between permissive Notch signaling and control of LH3 trafficking to regulate Col IV  
118 bioavailability during blood vessel development. We demonstrate that a Rab guanine exchange  
119 factor (GEF) is a downstream transcriptional target of Notch activation, linking Notch signaling to  
120 vesicular trafficking regulation of Col IV during blood vessel development.

## 121 122 **RESULTS**

### 123 **Loss of Rab10 impairs endothelial basement membrane secretion.**

124 Based on previous literature implicating the GTPase Rab10 as a Col IV trafficking  
125 mediator, we first sought to determine if Rab10 was involved in Col IV secretion in primary  
126 ECs[5]. ECs plated on coverslips demonstrated a robust secretion of Col IV marked by long  
127 trails leading back to individual ECs. Knockdown of Rab10 significantly diminished Col IV  
128 secretion with a limited amount of Col IV being deposited under the ventral/basal surface of the  
129 EC (**Figure 1A-1C**). Next, we transduced ECs with wild-type (WT), constitutively active (CA,  
130 Q68L) or a dominant negative (DN, T23N) Rab10 fused to a green fluorescence protein (GFP).  
131 ECs expressing a GFP-Rab10 WT or CA mutant did not show any difference in Col IV secretion  
132 compared with each other. However, expression of the GFP-Rab10 DN significantly reduced  
133 Col IV secretion compared to both WT and CA Rab10 (**Figure 1D and 1E**). Secreted Col IV is  
134 typically associated with other BM proteins such as perlecan and laminin[20, 21]. Knockdown of  
135 Rab10 also blunted the secretion of these vascular BM proteins (**Figure 1F and 1G**). It is  
136 possible that reduced secretion could be related to diminished migratory capacity in ECs lacking  
137 Rab10. To factor this out, we performed a scratch wound assay as a gauge of cell motility.  
138 There was no effect of Rab10 knockdown on cell migration (**Figure S1A and S1B**). Additionally,  
139 we determined that Rab10 did not affect apoptotic tendency by measuring cleaved caspase-3  
140 levels (**Figure S1C and S1D**). These results suggest that Rab10 is associated with Col IV  
141 secretion in ECs.

142 To determine if Rab10 affected 3-dimensional (3D) sprouting behaviors we employed a  
143 fibrin-bead assay in which ECs form multicellular sprouts in a fibrin matrix[22]. Loss of Rab10  
144 posed a severe detriment on sprouting behaviors with a 70-90% reduction in sprout parameters  
145 compared with controls (**Figure 1H-1K**). To further probe how loss and gain of function of  
146 Rab10 affected Col IV secretion in 3D sprouting, we mosaicly transduced GFP-Rab10 DN and  
147 CA mutants into growing sprouts. Staining non-permeabilized sprouts for secreted Col IV  
148 showed that ECs expressing the DN form of Rab10 had lower levels of perivascular Col IV,  
149 while the CA Rab10 mutant showed qualitatively elevated Col IV secretion compared with a  
150 non-transduced control (**Figure 1L and 1M**). In comparing sprout morphology, only the DN  
151 version of Rab10 impaired sprout length and number of branch points in reference to WT and

152 CA Rab10 expressing ECs (**Figure 1N and 1P**). Interestingly, both Rab10 CA and DN impaired  
153 sprout formation, the DN variant to a greater magnitude, compared with WT Rab10 (**Figure 1O**).  
154 These results indicate that Rab10 is necessary for *in vitro* sprouting. Additionally, these data  
155 suggest that the relative level of Rab10 activation may also be consequential for proper sprout  
156 formation.

157

### 158 **Rab10 influences Col IV bioavailability *in vivo*.**

159 To explore if Rab10 was required *in vivo* we turned to a mouse model of blood vessel  
160 development (**Figure S2A**). Homozygous loss of Rab10 was lethal at embryonic day 7,  
161 consistent with other reports[23]. Rab10 heterozygous mice (Rab10<sup>em1(IMPC)J</sup>) were viable and  
162 did not show any appreciable differences in survival compared with WT littermates. To examine  
163 if Rab10 heterozygosity impacted Col IV bioavailability and, subsequently, sprouting  
164 angiogenesis we examined the retinal vascular plexus[24]. There was no difference in sprouting  
165 parameters between Rab10<sup>+/-</sup> and WT littermates at postnatal (P) day 6 (**Figure 2A-C**).  
166 However, there was a ~18% reduction in vascular Col IV intensity in the Rab10<sup>+/-</sup> group  
167 compared with WTs, indicating Col IV secretion was slightly reduced with only one working  
168 Rab10 allele (**Figure 2D**). We confirmed this reduced Col IV abundance in serial sections of  
169 intracranial blood vessels alternating between H&E staining and Col IV immunohistochemistry  
170 to compare the same anatomical location between groups (**Figure 2E**). Other vessel beds, such  
171 as those in the dermal tissue showed a similar reduction in Col IV staining (**Figure S2B**). A  
172 fraction of specimens collected at P6 exhibited cerebral hemorrhage (**Figure S2C**) potentially  
173 suggesting compromised blood vessel integrity; although, this phenotype was not highly  
174 penetrant. These data suggest that Rab10 haploinsufficiency is associated with reduced  
175 perivascular Col IV.

176 Given Rab10 null mice were not viable, we moved to a zebrafish model to more easily  
177 gain access to earlier stages of development. The zebrafish Rab10 ortholog is 97% identical to  
178 the human ortholog (**Figure S2D**). Morpholino knockdown of Rab10 resulted in developmental  
179 defects, primarily a severe dorsalized phenotype compared with scrambled controls (**Figure**  
180 **2F**). Sectioning of morphant embryos expressing a vascular reporter *tg(kdrl:eGFP)* with normal  
181 cranial development at 72 hours post fertilization (hpf) showed a marked reduction in  
182 perivascular Col IV levels (**Figure 2G**). Confirming this observation, using transmission electron  
183 microscopy we observed that Rab10 morphants exhibited little to no basal lamina surrounding  
184 brain ECs compared with controls (**Figure 2H**). To subvert the effect of global Rab10 loss of  
185 function, we mosaicly over-expressed TagRFP-tagged Rab10 WT, CA or DN in the blood  
186 vessels of 72 hpf zebrafish. The resulting zebrafish showed mosaic vascular expression of  
187 Rab10 variants with no visible impact on body plan or the intersomitic vessels (**Figure 2I and**  
188 **2J**). Again, staining for Col IV in the brain vasculature, we observed that the Rab10 DN mutant  
189 alone reduced perivascular Col IV compared with overexpression of WT and CA Rab10  
190 constructs (**Figure 2K**). Strikingly, at 72 hpf fish injected with the DN Rab10 demonstrated  
191 elevated frequencies of cerebral hemorrhage and pericardial effusion, suggesting compromised  
192 blood vessel integrity (**Fig. 2L and 2M**). These results indicate that loss of Rab10 impairs Col IV  
193 bioavailability.

194

### 195 **Rab10 influences intracellular Col IV protein stability.**

196 Next, we sought to understand how Rab10 impacts Col IV secretion by first investigating  
197 normal Col IV cellular turnover in ECs. ECs incubated with the Golgi-disrupting compound  
198 brefeldin A (BFA) ablated Col IV secretion, suggesting that Col IV itself or its regulators use a  
199 classical post-Golgi trafficking route (**Figure 3A and 3B**). Next, cycloheximide (CHX) with and  
200 without BFA was added to inhibit new protein synthesis to determine the half-life of the  
201 intracellular Col IV pool in the absence of secretion. Cycloheximide addition reduced the  
202 intracellular Col IV pool by 75% at 4 hours (**Figure 3C**). Strikingly, addition of the secretion

203 inhibitor BFA doubled the Col IV content in the cycloheximide condition (**Figure 3D and 3E**),  
204 indicating that at least half of the Col IV decay was due to secretion. Knockdown of Rab10  
205 closely mimicked BFA-induced intracellular Col IV retention (**Figure 3F and 3G**). These results  
206 demonstrate the EC Col IV pool is rapidly secreted and knockdown of Rab10 resembles  
207 chemically induced inhibition of secretion, thus Rab10 may play a mechanistic role in this  
208 pathway.

209 Vascular endothelial growth factor (VEGF) is one of the most well-characterized  
210 proangiogenic factors and is essential for angiogenesis[24-28]. Given VEGF signaling is  
211 required for embryonic blood vessel development, we sought to determine how VEGF  
212 influenced Col IV secretion. Strikingly, VEGF ligand administration significantly impeded Col IV  
213 secretion in freely migrating ECs compared with ECs in serum-starvation (SS) culture media  
214 (**Figure 3H and 3I**). Moreover, VEGF supplementation showed a concentration-dependent  
215 reduction in Col IV, laminin and perlecan secretion (**Figure S3**). Once again, we used  
216 cycloheximide to determine the half-life of intracellular Col IV with VEGF stimulation. In line with  
217 the general lack of secretion in the VEGF-treated ECs, VEGF stimulation depleted the Col IV  
218 intracellular pool compared with a SS control (**Figure 3J**). Incubation with the lysosomal  
219 inhibitor chloroquine (CLQ) rescued VEGF-mediated loss of Col IV, indicating that VEGF  
220 induced Col IV destruction via the lysosome (**Figure 3K**). We next compared how Rab10  
221 affected intracellular Col IV levels in VEGF-exposed and SS states. Knockdown of Rab10 in the  
222 presence of VEGF still resulted in Col IV degradation as compared with the SS state or BFA  
223 control when treated with cycloheximide (**Figure 3L**). This finding promotes the notion that  
224 VEGF-induced Col IV degradation does not involve Rab10, suggesting that Rab10 is  
225 participating in a secretory, not a degradative pathway. To ensure this degradative response to  
226 VEGF was not restricted to human umbilical vein ECs, we assayed for intracellular Col IV levels  
227 in human aortic, human brain, human microvascular and human dermal primary ECs. Across all  
228 primary cell lines, Col IV levels were reduced in the VEGF-treated state compared with SS ECs  
229 (**Figure 3M**), suggesting this is likely a global endothelial response.

### 230 231 **Rab10 and Rab25 work in combination to traffic LH3 to collagen IV containing vesicles.**

232 Given the strong effect of Rab10 on both Col IV secretion and bioavailability, we  
233 originally hypothesized that Rab10 was directly mediating Col IV vesicular trafficking (e.g.  
234 directly attached to Col IV vesicles). However, we did not observe Rab10 co-localization with  
235 Col IV-containing (CIVC) vesicles (**Figure 4A**). This lack of co-localization elevated the  
236 hypothesis that Rab10 may play an indirect role in Col IV trafficking. To this end, the lysyl  
237 hydroxylase 3 (LH3) enzyme has been shown to be critical for Col IV secretion and post-Golgi  
238 protein stability[29]. Additionally, it has been previously reported that LH3 trafficking requires  
239 both Rab10 and Rab25[30]. To determine if Rab10 was involved in the LH3 trafficking itinerary,  
240 we first compared Col IV secretion between Rab10 and Rab25 knockdowns to LH3  
241 knockdowns. Loss of Rab10 or Rab25 phenocopied the reduced EC Col IV secretion observed  
242 with LH3 KD (**Figure 4B and 4C**), indicating that both Rab10 and Rab25 impact Col IV  
243 secretion to a similar magnitude compared with LH3 depletion. Rab10 and Rab25 depletion also  
244 significantly reduced sprouting parameters similar to LH3 knockdown in reference to a control  
245 group (**Figure 4D-4G**). These data demonstrate that Rab10 and Rab25 equally affect Col IV  
246 secretion and sprouting parameters in comparison to LH3 knockdown.

247 Reasoning that LH3 is the cargo of Rab10 and Rab25, we first determined the efficiency  
248 of LH3 transport to CIVC vesicles in the VEGF-treated and SS state in which Col IV secretion is  
249 greatly affected. We observed that in the SS state, LH3 co-localized with CIVC vesicles 99% of  
250 the time, while VEGF-treatment reduced LH3/CIVC vesicle co-localization by ~60% (**Figure 4H**  
251 **and 4I**). Given the SS culture condition produced a near perfect co-localization between LH3  
252 and CIVC vesicles, we used this SS condition to test how loss of Rab10 and Rab25 trafficking  
253 impacts LH3 transport to CIVC vesicles. Strikingly, knockdown of Rab10, Rab25 or combination

254 significantly reduced LH3 and CIVC vesicle co-localization compared with controls (**Figure 4J**  
255 **and 4K**). In this experiment, chloroquine was added to prevent both LH3 and Col IV degradation  
256 to determine what fraction may be lysosomally degraded when Rab10 and Rab25 trafficking  
257 mediators are absent. Interestingly, lysosome inhibition significantly reduced the percentage of  
258 co-localization of LH3 and CIVC vesicles in Rab10 and Rab25, but not in double knockdown  
259 groups suggesting that a fraction of the LH3 or Col IV pool is degraded when trafficking is  
260 disrupted (**Figure 4K**). We next expressed WT, CA and DN Rab10 versions in ECs cultured in  
261 SS media. Wild-type and CA Rab10 overexpression did not affect LH3 transport to CIVC  
262 vesicles; however, the DN Rab10 mutant alone reduced LH3/CIVC vesicle co-localization by  
263 50% (**Figure 4L and 4M**), a finding congruent with knockdown of Rab10.

264 Given the hypothesis that Rab10 and Rab25 function in coordination to deliver LH3 to  
265 CIVCs, we would expect to find higher co-localization between the two Rabs when stimulated  
266 for secretion. Overexpression of Rab10 WT and Rab25 WT revealed a 50% co-localization in  
267 SS media, while only about 30% of the puncta show co-localization in VEGF supplemented  
268 media (**Figure 4N and S4A**). Taking a more directed approach, we co-expressed combinations  
269 of WT, CA, and DN versions of both Rab10 and Rab25 to further investigate if their co-  
270 localization is dependent on activation. Our results demonstrate that expression of the DN  
271 Rab10 or Rab25 significantly diminished colocalization compared with any combination of WT  
272 or CA, indicating an activation dependency (**Figure 4O and S4B**). To determine if this Rab10  
273 affected LH3 trafficking *in vivo* we compared retina staining between WT and Rab10<sup>+/-</sup> P6 mice  
274 and observed a lack of CIVC co-localization with LH3 (**Figure 4P and 4Q**).

275 CIVC vesicles staged for secretion are present as large Col IV puncta that are easily  
276 distinguishable from Col IV that is resident in the ER or extracellular environment. Knockdown of  
277 Rab10, Rab25 or LH3 (as a negative control) showed a significant reduction in the number of  
278 ECs with detectable CIVC vesicles, indicating the loss of Rab10 or Rab25 affects the formation  
279 of these structures (**Figure S4C and S4D**). Previous reports determined that vacuolar protein  
280 sorting (vps) protein VPS33B was necessary for delivery of LH3 to CIVCs through direct binding  
281 of Rab10 and Rab25 [30]. Knockdown of VPS33b significantly reduced Col IV secretion and  
282 LH3 trafficking to CIVC vesicles (**Figure S4E-S4H**), consistent with a requirement for Rab10  
283 and Rab25 in trafficking LH3 to CIVC vesicles. Overall, this data suggests that Rab10 and  
284 Rab25 work cooperatively to transport LH3 to CIVC vesicles during Col IV secretion (**Figure**  
285 **4R**).

### 286 **Notch signaling regulates LH3 trafficking.**

287 Notch signaling in vascular development has been shown to control gene transcription  
288 networks critical for blood vessel maturation[19, 31, 32]. Given Col IV BM secretion is  
289 associated with more stable, quiescent blood vessels, we sought to determine if Notch signaling  
290 intersected with LH3 trafficking via Rab10 and Rab25 to control Col IV secretion. We previously  
291 determined that VEGF ligand stimulation largely inhibited Col IV secretion, while SS media  
292 greatly increased Col IV secretion (**Figure 3H and I**). In each condition, we assayed for the  
293 Notch transcriptional target Hes1 and found that in the SS condition this transcript was  
294 significantly elevated, reflecting high-Notch activation (**Figure 5A and S5A**). Using our basal  
295 culture media, which contains a proprietary concentration of VEGF, as a control, we compared  
296 Col IV secretion in the elevated Notch SS condition to SS media supplemented with either  
297 VEGF, or Notch inhibitor DAPT. Serum-starved ECs significantly increased Col IV secretion in  
298 reference to the basal media as we previously showed (**Figure 3H,I**); however, both VEGF or  
299 DAPT administration completely abolished Col IV secretion (**Figure 5B, 5C, S5B, and S5C**).  
300 These results demonstrate that Notch signaling is required for Col IV secretion.

301 One potential reason for the lack of LH3 and CIVC vesicle co-localization could be due  
302 to a reduction in Col IV expression. To explore this, we cultured ECs in SS media and blocked  
303 Notch activation with either DAPT or by adding VEGF and then monitored Col IV transcriptional  
304

305 levels. DAPT and VEGF did not alter transcription of Col IV compared with SS control (**Figure**  
306 **S5D and S5E**). To determine if Notch activity was influencing LH3 trafficking we measured co-  
307 localization of LH3 and CIVC vesicles with and without DAPT. Across all conditions, Col IV  
308 puncta were present indicating that Col IV transcription was not changed despite Notch  
309 inhibition. Notch inhibition dramatically reduced LH3/CIVC vesicle co-localization to an even  
310 greater extent than VEGF treatment, in reference to a SS control (**Figure 5D and 5E**). Overall,  
311 these data suggest that Notch signaling is required for LH3 transport to CIVC vesicles and  
312 downstream Col IV secretion.

313

### 314 **Notch signaling regulates Rab10 GTPase activity through DENND4C.**

315 Rabs generally operate in a cascade mechanism where guanine exchange factors  
316 (GEFs) convert Rabs from GDP- 'off' to GTP-bound 'on' states [33, 34]. DENND4A,B, and C  
317 have been implicated in the activation of Rab10[5, 35]. Interestingly, Rab25 is an atypical Rab  
318 that does not have an identified GEF and likely functions more akin to a Rab effector [36, 37].  
319 Our data suggested that activation of Rab10 is required for LH3 transport to CIVC vesicles  
320 (**Figure S6A**), thus we explored the idea that Notch governs Rab10 activity through differential  
321 GEF expression. First, we surveyed the DENND4 loci for RBPJ Notch-responsive elements in  
322 their 5' cis region (**Figure 6A and 6B**)[38, 39]. Sequence analysis of all three DENND4s  
323 revealed that all variants harbored RBPJ binding sites within their respective 0, -2000 5'  
324 untranslated region; however, only DENND4C exhibited a clustering of RBPJ sites close (0, -  
325 500) to the transcriptional start site (**Figure 6B**). Expression analysis between the Notch-low  
326 and Notch-high media conditions demonstrated that only DENND4C was significantly  
327 upregulated in the SS state (**Figure 6C**), suggesting that Notch activation can directly modulate  
328 this transcript. Knockdown of both DENND4A and DENND4C, but not DENND4B, reduced Col  
329 IV secretion compared with controls (**Figure 6D and 6E**). However, only DENND4C significantly  
330 reduced LH3 co-localization with CIVC vesicles, indicating that DENND4C is likely the major  
331 Rab10 GEF required for LH3 trafficking in ECs (**Figure 6F and 6G**). These results indicate that  
332 DENND4C is a Notch target. Additionally, this provides further evidence that Rab10 activation  
333 by DENND4C is required for LH3 trafficking and Col IV secretion.

334

### 335 **DISCUSSION**

336 Despite the major biological requirement of Col IV BM for blood vessel integrity and  
337 homeostasis, very little is understood about its regulation. Moreover, how Col IV, or other critical  
338 BM proteins are regulated by non-transcriptional programs in ECs is largely unknown. To our  
339 knowledge, this is the first investigation posing a direct link between the regulation of Col IV  
340 secretion in angiogenesis through modulation of trafficking mediators by way of permissive  
341 Notch signaling. Our results demonstrate that Rab10 works in combination with Rab25 to  
342 transport LH3 to CIVC vesicles staged for secretion. In the absence of Rab10 or Rab25, LH3  
343 transport is halted and Col IV secretion in ECs is dramatically attenuated. Putting this trafficking  
344 paradigm into a larger angiogenic framework, we discovered that Notch signaling is required for  
345 Rab10 activation, which seems to be the signaling bottleneck for LH3 trafficking and subsequent  
346 Col IV secretion. Overall our data illustrate how Notch-based maturation signaling can influence  
347 trafficking mediators, providing a critical level of regulation in Col IV secretion during blood  
348 vessel development (**Figure 6H**).

349 Col IV is highly conserved and can be traced down to the earliest bilaterians[40]. Col IV  
350 itself is expressed, to some extent, in every vertebrate tissue as an integral BM protein. It is  
351 well-established that Col IV is highly enriched in blood vessels and contributes to the overall  
352 vascular BM[41]. Col IV is not required for angiogenesis; however, Col IV is required for blood  
353 vessel maturation and homeostasis[15]. This enrichment is related to the ability of blood vessels  
354 to resist the mechanical strain of circulation. Mutations in Col IV (alpha 1 or alpha 2) in human  
355 patients confirm the foundational requirement of Col IV in blood vessel integrity, as the primary

356 clinical manifestation of individuals with SVD is intracerebral hemorrhage. Moreover, SVD  
357 patients, who harbor Col IV mutations, demonstrate compromised vessel integrity leading to  
358 microbleeds or intracerebral hemorrhages[16]. Rodent experimental models of Col IV mutations  
359 strongly echo results in human cohorts in demonstrating that loss of Col IV function or  
360 availability results in either embryonic lethality or early postnatal death by way of  
361 hemorrhage[15]. These observations clearly indicate that Col IV bioavailability is paramount for  
362 blood vessel homeostasis and normal life expectancy.

363 We investigated post-transcriptional factors that regulate Col IV secretion in ECs and  
364 discovered that Rab10 and Rab25 are major trafficking mediators. Rab10 in particular has been  
365 implicated in a myriad of processes ranging from GLUT trafficking to regulating ER  
366 dynamics[42, 43]. In our hands, Rab10 echoed previous reports in *Drosophila melanogaster*  
367 egg chamber development by affecting Col IV secretion; although, our data indicated that  
368 Rab10 is an indirect mediator of Col IV trafficking[5]. Our results were congruent with a second  
369 report observing that LH3 post-Golgi sorting is controlled, in part, by Rab10 and Rab25 in  
370 mouse epithelial cells[30]. Extending these observations in primary ECs, we found that LH3 was  
371 indeed required for Col IV secretion, and LH3s delivery to CIVC vesicles was paramount to this  
372 process. Interestingly, we also found that Rab10 was the major regulatory step as compared  
373 with Rab25. Rab25 is an atypical Rab GTPase that does not possess a canonical GEF for its  
374 activation, and thus may behave more akin to a Rab10 effector. While Rab25 was necessary for  
375 LH3 trafficking and Col IV secretion, its precise role in this cascade has yet to be determined.  
376 On the other hand, Rab10 has three previously reported activating GEFs, DENND4 A, B, and C,  
377 requiring a more classical GEF-dependent activation.

378 Given the stark dependence on Rab10 for LH3 trafficking to CIVC vesicles, we were  
379 very intrigued by what upstream mechanisms control Rab10 activity and how they might  
380 interface with blood vessel maturation programs. Notch signaling is fundamental to  
381 angiogenesis and adult blood vessel homeostasis[19]. In aggregate, Notch activation is  
382 repressive, decreasing EC migration and proliferation programs and is generally associated with  
383 heightened vessel maturity [19]. In the absence of Notch, blood vessels demonstrate a chronic  
384 sprouting phenotype marked by unchecked proliferation and overgrowth[31, 44]. We showed  
385 that Notch activation is capable of orchestrating LH3 trafficking to CIVC vesicles by controlling  
386 transcription of the Rab10 GEF, DENND4C. This finding has important implications in providing  
387 evidence that permissive Notch signaling can also interface with trafficking mediators in a  
388 comprehensive top-down regulatory response during angiogenesis.

389 We observed that the administration of the powerful angiocrine factor, VEGF, effectively  
390 shut down Col IV secretion by inhibiting LH3 trafficking via reduction of Rab10 and Rab25  
391 activation. In the context of early blood vessel development, EC migration through tissue is  
392 reliant on secretion of BM degrading enzymes, such as MMP9[45]. Energetically, it may be  
393 more advantageous to partition ECM breakdown signaling from ECM synthesis signaling as to  
394 not mutually undermine each process. In this study, the division between Col IV secretion and  
395 degradation was controlled by LH3 trafficking and upstream activation of Notch signaling. It is  
396 well established that in a growing sprouts, the leading tip cell has low Notch and the trailing stalk  
397 cells have high Notch activation[46, 47]. Our results very closely adhere to this model. In a low  
398 Notch state, the tip cell has elevated VEGFR2 expression, thus is experiencing more VEGF  
399 signaling and, according to our findings, would likely not be secreting Col IV; potentially shunting  
400 more energetic resources to migration and ECM degradation. However, in the stalk cells where  
401 Notch activation is elevated, these ECs are buttressing the newly made vascular tunnel by  
402 secreting Col IV by, in part, activated LH3 trafficking. To our knowledge, this the first link  
403 between Notch signaling and regulation of vascular BM secretion at the post-Golgi trafficking  
404 level.

405 Our results bring into question how Notch may directly impact the trafficking regulation of  
406 other critical BM proteins necessary for blood vessel integrity. For instance, others have



407 reported that laminin-111 binds receptors and activates Dll4 signaling[48, 49]. One may  
408 speculate that the impact of Notch on the secretion machinery may elicit a feed-forward  
409 mechanism in which secretion of BM components binds integrin receptors that reinforce Notch  
410 activation. This type of cascade could explain cell-cell independent Notch signaling programs for  
411 sustained activation of blood vessel maturity programs required for adult vascular homeostasis.  
412 However, the organotypic trafficking programs that govern secretion of Col IV and other BM  
413 components are largely un-mapped and will require future investigations.  
414

415 **ACKNOWLEDGEMENTS**

416 Work was supported by funding from the National Heart Lung Blood Institute (Grant  
417 1R56HL148450-01, R00HL124311) (S.J.G, A.M.W, and E.J.K). This work was also supported  
418 by the American Heart Association grant (#18PRE33990097)(S.J.G). We also thank Jennifer  
419 Bourne and the Electron Microscopy Center at the University of Colorado Anschutz Medical  
420 Campus for assistance with transmission electron micrograph collection and Histotox Labs for  
421 tissue processing and staining. Additionally, we thank the Kushner Lab for comments and  
422 technical support.

423

424

425 **CONTRIBUTIONS**

426 S.J.G., A.M.W, A.D.P, and E.J.K created zebrafish and cell line constructs. S.J.G. and E.J.K  
427 conceived all experiments. R.J. performed mouse retinal experiments. J.R.D. performed  
428 histopathology evaluation. S.J.G. and E.J.K wrote the manuscript.

429

430

431

## 432 **Material and Methods**

### 433 DNA Cloning

434 Unless otherwise stated, all middle entry vectors were generated by PCR amplification of the  
435 desired middle element using attL1/L2- flanked oligonucleotide primers, followed by an LR  
436 reaction with either pLenti\_705 (17392, Addgene) or pLEX\_307 (41392, Addgene). A Gibson  
437 assembly was performed with the desired middle elements to be assembled into an EcoRI-  
438 BamHI linearized pME-MCS destination. To generate the Rab10 clones, full-length human  
439 cDNA Rab10 was synthesized using gene blocks (Operon) and cloned into pME-MCS vector  
440 using the primer sequences described in supplementary table 1. Full-length human Rab25  
441 cDNA was purchased from Origene (RC203413, ORGene) and cloned into pME-MCS as  
442 described supplementary table 1. Point mutations were introduced via a Q5 site-directed  
443 mutagenesis kit (E0554S, NEB) using primers described in supplementary table 1. All  
444 constructs were verified with sequencing.

### 446 Cells and Cell Culture

447 Primary human umbilical vein cells (HUVECs; PromoCell) were cultured in EBM-2 medium  
448 supplemented with 5% fetal bovine serum (FBS), 1% penicillin/streptomycin and 1% growth  
449 supplemental kit (EGM-2). Only cells in passages 2-10 were used for our experiments. Human  
450 aortic endothelial cells (HAECs) (ACBRI375, Cell-Systems), human brain microvasculature  
451 endothelial cells (HBMECs) (ACBRI376, Cell-Systems) and human dermal microvasculature  
452 endothelial cells (HDMECs) (CSC2M1, Cell-Systems) were all cultured in EGM-2. The serum  
453 starve medium is composed of Optimem (11058021, ThermoSci) supplemented with 1% FBS  
454 (25-514, GeneseeSci) and 1% penicillin/streptomycin (P4333, Sigma). Human lung fibroblasts  
455 (NHLFs) (CC-2512, Lonza) were cultured in Dulbecco's modified Eagle's medium (DMEM) (25-  
456 501B, GeneseeSci) media supplemented with 10% FBS and 1% penicillin/streptomycin. Human  
457 embryonic kidney cells (HEKs) (85120602, Sigma) were cultured in DMEM media  
458 supplemented with 10% FBS and 1% penicillin/streptomycin. All cells were grown at 37C in a  
459 humidified atmosphere with 5% CO<sub>2</sub>.

### 461 Zebrafish

462 Zebrafish (*Danio rerio*) were bred and housed in standard conditions in accordance with the  
463 University of Denver. The *Tg(kdrl:eGFP)* (kind gift Victoria Bautch), *Tg(cdh5:gal4FF)* (kind gift  
464 Arndt Siekmann), *Tg(5xUAS:tRFP Rab10)* (this study), *Tg(5xUAS:tRFP Rab10<sup>Q68L</sup>)* (this study),  
465 *Tg(5xUAS:tRFP Rab10<sup>T23N</sup>)* (this study). Procedures used in the experiments were approved by  
466 the Institutional Animal Care and Use Committee. Morpholinos were purchased from GeneTools  
467 LLC and injected using standard protocols. For cryosectioning, zebrafish were fixed in 4% PFA  
468 overnight and dehydrated in 100% methanol for 48 hours. Thereafter, embryos were briefly  
469 rehydrated in TBST and then incubated in a 30% sucrose solution for 24 hours. Fish were  
470 embedded in OCT prior to sectioning and staining as previously reported[50]. Images were  
471 obtained using a Leica m165 FC Stereoscope. Zebrafish subjected to TEM were fixed in 4%  
472 PFA and 2% glutaraldehyde for 24 hours. TEM processing and imaging were done at University  
473 of Colorado TEM core facility.

### 475 Mice

476 Mice were bred and housed in standardized conditions in the Mouse Research Animal Facility  
477 at University of Denver and monitored regularly to maintain a pathogen-free environment.  
478 Procedures used in the experiments were approved by the Institutional Animal Care and Use  
479 Committee. Rab10<sup>em1(IMPC)J</sup> mice were obtained from The Jackson Laboratory (MMRRC#  
480 42330). Rab10<sup>em1(IMPC)J</sup> pups were obtained via intercrossing of heterozygous mutants or via  
481 outcrossing with BL6 background mice. None of the intercrossed heterozygote mutant offspring

482 were found to be homozygous null, consistent with other reports[23]. At the time of sacrifice  
483 genotypes were determined via tail-clips and PCR.

484

#### 485 Statistics

486 All statistical analyses were conducted using GraphPad PRISM software. Student's *t*-test were  
487 used to compare the difference between the control and treated group in our studies. A two-  
488 tailed  $P < 0.05$  was significant, and the data are presented as mean  $\pm$  95% confidence interval.

489

490

## 491 **Supplemental Methods**

### 492 DNA Cloning

493 For co-expression of Rab10 and Rab25 in HUVECs, the destination plasmid pShuttle-CMV  
494 (16403, Addgene) was used. To create relative similar levels of expression the two genes of  
495 interest were fused together via a p2a viral DNA element. The primers used to clone tRFP-  
496 Rab10 and BFP-Rab25 are shown in supplementary table 1. A Gibson assembly was used to  
497 assemble all desired elements into the XhoI, EcoRV linearized pShuttle-CMV. All constructs  
498 were verified by sequencing.

### 500 Collagen IV Extracellular Secretion Assay

501 Extracellular Col IV ratio is quantified by taking the total fluorescence intensity of Col IV and the  
502 fluorescence intensity inside the cell perimeter. Col IV extracellular ratio = [(total fluorescence –  
503 inside fluorescence)/inside fluorescence] \*100. A value at 1 or below is representative of little/  
504 no Col IV secretion while a value above 1 is representative of substantial Col IV secretion.  
505 Values are then normalized to control condition values. Brefeldin A (00-498093, ThermoSci),  
506 chloroquine (C6628, Sigma), cycloheximide (C7698, Sigma) and VEGF (V7259, Sigma) were  
507 used for indicated experiments.

### 509 Endothelial Cell Transfection Assay

510 Cells were transfected using the Neon Transfection System (MPK5000, ThermoSci) according  
511 to manufacturer s protocol. Briefly, cells were trypsinized and washed with DPBS then  
512 suspended in a solution of R-buffer (100µl; Invitrogen) containing either (100µM) siRNA or (1µg)  
513 over-expression plasmids (pLenti\_705, pLEX\_307 or pShuttle-CMV) using the recommended  
514 electroporation protocol (1350 V, 30 ms, 1 pulse). Then, cells were either plated onto pre-  
515 treated poly-L-lysine coated glass coverslips for IHC and live-imaging or plated into petri dishes  
516 for WB experiments and placed in 37C and 5% CO<sub>2</sub>. IHC and live-imaging experiments were  
517 conducted 18-30 hours after transfection while cell lysates were harvested 48-72 hours after  
518 transfections.

### 520 Immunohistochemistry

521 Standard procedures were used for IHC[2]. Briefly, HUVECs grown on poly-L-lysine coated  
522 coverslips were washed and subsequently fixed with 4% PFA for 10 min. Cells were then  
523 washed and incubated at RT with 0.1% Triton-X for 10 min. Blocking was performed with 2%  
524 BSA prior to primary antibody incubation. Commercial antibodies used include: goat anti-Col IV  
525 (ab769, Sigma), rabbit anti-Col IV (ab6586, Abcam), rabbit anti-Laminin (L9393, Sigma), mouse  
526 anti-heparan sulfate proteoglycan (MABT12, Sigma) and mouse anti-PLOD3 (SAB1400329,  
527 Sigma). AlexaFluor conjugated secondary antibodies include donkey anti-goat 555(A32816,  
528 ThermoSci) and donkey anti-mouse 647 (A31571, ThermoSci). Hoechst 33342 (H3570,  
529 ThermoSci) used as a DNA stain. For wound healing assays, scratches were made when  
530 HUVECs were 90% confluent. Dishes were washed twice and then replaced fresh EGM-2  
531 medium for up to 8 hours before fixation with 4% PFA. CellEvent Caspase-3/7 (C10723,  
532 ThermoSci) was used to investigate transfection efficiency. All histology was performed at  
533 HistoTox Labs (Boulder, CO).

### 535 Sprouting Assay

536 A fibrin-bead sprouting assay was conducted as described by Nakatsu et al. [22]. Briefly, after  
537 trypsinization, HUVECs were incubated with cytodex3 microcarrier beads (C3275, Sigma) at a  
538 ratio of 400 cells per bead. The samples were incubated for 4 hours with agitation every 15 min.  
539 The mixture was then transferred to a 6cm<sup>2</sup> dish and cultured at 37C overnight. The next day,  
540 beads coated with HUVECs were collected and resuspended in a 2mg/ml fibrinogen solution

541 (F8630, Sigma), which contained 0.15 U/ml aprotinin (A1153, Sigma). As the beads were added  
542 to poly-L-lysine pre-treated glass coverslips, 0.625 U/ml thrombin (T4648, Sigma) was added,  
543 gently mixed, and incubated at 37C until the gel solidifies. Then, 25,000 NHLFs which were  
544 resuspended in 1ml EGM-2 were added on top of the gel. The media was changed every 2 days  
545 and fixed 6-8 days after embedding with 4% PFA. Standard IHC staining solutions were used.  
546 Images were obtained on inverted Nikon Ti-E spinning disk confocal and analyzed with FIJI  
547 software.

548

#### 549 Protein and RNA Isolation from Endothelial Cells

550 Western blotting was performed using standard procedures. Whole cell lysates were harvested  
551 for protein extraction 48-72 hours after transfection. An equal amount (20-35g) of protein was  
552 electrophoresed on 12% and 7% polyacrylamide gels and then transferred to nitrocellulose  
553 membranes. The membrane was blocked in ~5% milk or 2% BSA followed by antibody  
554 incubation overnight at 4C. Antibodies used are listed below: rabbit anti-  $\alpha$ -tubulin (ab52866,  
555 Abcam); mouse anti-Rab10 (MABN730, Sigma); rabbit anti-Col IV (ab6586, Abcam). The  
556 internal loading control for all experiments was  $\alpha$ -tubulin. Secondary HRP (GeneseeSci) and  
557 ProSignal ECL substrate (20-300B, GeneseeSci) were used. For GTP associations, ECs were  
558 incubated with indicated media then lysed and incubated with guanosine 5'-triphosphate  
559 agarose beads (G9768, Sigma). RNA extraction was performed using TRIzol (15596026,  
560 ThermoSci) with standard procedures. RT-PCR was performed on cDNA libraries using high-  
561 capacity cDNA reverse transcription kit (4368814, ThermoSci) according to manufacturer  
562 instructions. PCRs were performed using ProFlex PCR System (4484073, ThermoSci).

563

#### 564 Generation of *Tg(5xUAS:tRFP Rab10)* mutant lines

565 Unless otherwise stated, all middle entry vectors were generated by PCR amplification of the  
566 desired middle element using extended and over-hanging oligonucleotide primers, followed by a  
567 Gibson assembly with a middle entry plasmid. The tol2 cloning system was used to assemble  
568 the p5E 5xUAS promoter and the pME- into a modified 395-destination plasmid (this study).

569

#### 570 Retina Extraction

571 Eyes from male and female mice were harvested at p6 and fixed in 4% PFA for 2 hours at room  
572 temperature. Immediately after fixation, retinas were dissected and flattened by making curve-  
573 relieving cuts. The retinas were then fixed for an additional 1-2 hours. Then, retinas were placed  
574 in 2% BSA blocking solution overnight at 4C. On day 2, retinas were stained for 24 hours at 4C  
575 with goat anti-collagen IV (same as IHC) and rabbit anti-PLOD3 antibody (HPA001236, Sigma).  
576 On day 3, retinas were washed twice in TBST and then stained for 24 hours at 4C with  
577 conjugated Isolectin B4 (IB4) and Hoechst 33342 (see IHC), donkey anti-goat 555 (same as  
578 IHC) and donkey anti-mouse 647 (same as IHC). On day 4, the specimens were washed three  
579 times in TBST for 10 min and then left in TBST overnight at 4C. On day 5, the retinas were  
580 mounted on slides and imaged.

581

582

### Supplemental Tables:

| Gene of Interest | Forward Primer                                      | Reverse Primer                                                |
|------------------|-----------------------------------------------------|---------------------------------------------------------------|
| TagRFP           | gcttgatcgttaatatggtgtctaagggcga<br>agagc            | ggtggcgaccggtggatccgtgctcccgaattaagttgtg<br>ccccagtttgctaggg  |
| GFP              | taagcttgatcgttaatatgagtaaaggag<br>aagaacttttcactgga | ggcgaccggtggatccgtgctcccgatttgatagttcatcc<br>atgccatgtgtaatcc |
| Rab10            | tccaccggtcgccaccatggcgaagaagac<br>gtacgacctg        | gaactagtgatcgtttcagcagcatttgctcttcagc                         |

|                 |                                                                 |                                                              |
|-----------------|-----------------------------------------------------------------|--------------------------------------------------------------|
| BFP             | gcttgatatcgtaattaagccgccaccatga<br>gcgagctgattaaggagaaca        | ccccccgcccggagccccaccgcccgtgcccagttgct<br>aggga              |
| Rab25           | gcggtgggggctccggcgggggggtcc<br>gggaatggaactgaggaagattataac      | ctagaactagtgatcgtttaacttagaggctgatgcaac<br>aggccc            |
| tRFP-Rab10 p2a  | cgacgcggccgctcgaggccgccaccatg<br>gtgtctaaggcggaagagc            | tgcttgcttagcagagagaagttgtggcgccgctgccgc<br>agcattgtcttccagcc |
| p2a BFP-Rab25   | agcaagcaggtgatgtgaagaaaaccccg<br>ggcctagcgagctgattaaggagaacatgc | ctagatccggtggatcggatcttagaggctgatgcaaca<br>ggccctc           |
| Rab25 S21V - CA | ggcgaagtaggtgtgggaagac                                          | gatcagcaccacctgaagacaaa                                      |
| Rab25 T26N - DN | gggaagaacaatctactctcccg                                         | cacacctgattcggatcagc                                         |

583 **Supplementary Table I. General Cloning Primers.**

584 Sequences of the primer pairs used to assemble middle entry plasmids of either GFP or  
585 TagRFP versions of Rab10 WT, CA or DN as well as BFP versions of Rab25 WT, CA or DN.

586  
587

| Gene of Interest | Forward Primer             | Reverse Primer            |
|------------------|----------------------------|---------------------------|
| GAPDH            | tgcaccaccaactgcttagc       | ggcatggactgtggtcatgag     |
| Col4a1 N-term    | gatgaagggtgatccaggtgagatac | cttgagctgtcctggtactcctgg  |
| Col4a1 C-term    | acagccagaccattcagatcccacc  | gcacttctaaactcctccaggcagg |
| Hes1 A           | tcaacacgaccggataaa         | ccgagctatctttctca         |
| Hes1 B           | tgccagctcatataatggaggaa    | ccatgataggctttagtgacttt   |

588 **Supplementary Table II. RT-PCR primers.**

589 Sequences of the primers used in RT-PCR analysis of gene expression in ECs.

590  
591

|          |                      |
|----------|----------------------|
| Common_F | ctgttttccttcagctcagt |
| WT_R     | cagcatcacaggaaccaaac |
| Rab10_R  | cattggagaaaagcatcagg |

592 **Supplementary Table III. Mouse Genotyping Primers.**

593 Sequences of the primers used to determine the genotype of Rab10.

594  
595  
596

597 **REFERENCES**

- 598 1. Kushner, E.J. and V.L. Bautch, *Building blood vessels in development and disease*. Curr  
599 Opin Hematol, 2013. **20**(3): p. 231-6.
- 600 2. Kushner, E.J., et al., *Excess centrosomes disrupt endothelial cell migration via*  
601 *centrosome scattering*. J Cell Biol, 2014. **206**(2): p. 257-72.
- 602 3. Kushner, E.J., et al., *Excess centrosomes perturb dynamic endothelial cell repolarization*  
603 *during blood vessel formation*. Mol Biol Cell, 2016. **27**(12): p. 1911-20.
- 604 4. Bahramsoltani, M., et al., *Angiogenesis and collagen type IV expression in different*  
605 *endothelial cell culture systems*. Anat Histol Embryol, 2014. **43**(2): p. 103-15.
- 606 5. Lerner, D.W., et al., *A Rab10-dependent mechanism for polarized basement membrane*  
607 *secretion during organ morphogenesis*. Dev Cell, 2013. **24**(2): p. 159-68.
- 608 6. Isabella, A.J. and S. Horne-Badovinac, *Building from the Ground up: Basement*  
609 *Membranes in Drosophila Development*. Curr Top Membr, 2015. **76**: p. 305-36.
- 610 7. Denning, S.M., et al., *Collagen subtypes III and IV expression in human vein graft*  
611 *atherosclerosis*. Am J Cardiol, 1996. **78**(6): p. 691-4.
- 612 8. Astrof, S. and R.O. Hynes, *Fibronectins in vascular morphogenesis*. Angiogenesis,  
613 2009. **12**(2): p. 165-75.
- 614 9. Kalluri, R., *Basement membranes: structure, assembly and role in tumour angiogenesis*.  
615 Nat Rev Cancer, 2003. **3**(6): p. 422-33.
- 616 10. Liliensiek, S.J., P. Nealey, and C.J. Murphy, *Characterization of endothelial basement*  
617 *membrane nanotopography in rhesus macaque as a guide for vessel tissue engineering*.  
618 Tissue Eng Part A, 2009. **15**(9): p. 2643-51.
- 619 11. Armulik, A., G. Genove, and C. Betsholtz, *Pericytes: developmental, physiological, and*  
620 *pathological perspectives, problems, and promises*. Dev Cell, 2011. **21**(2): p. 193-215.
- 621 12. Coelho, N.M., et al., *Arrangement of type IV collagen and laminin on substrates with*  
622 *controlled density of -OH groups*. Tissue Eng Part A, 2011. **17**(17-18): p. 2245-57.
- 623 13. Theocharis, A.D., et al., *Extracellular matrix structure*. Adv Drug Deliv Rev, 2016. **97**: p.  
624 4-27.
- 625 14. Aumailley, M., et al., *Altered synthesis of laminin 1 and absence of basement membrane*  
626 *component deposition in (beta)1 integrin-deficient embryoid bodies*. J Cell Sci, 2000. **113**  
627 **Pt 2**: p. 259-68.
- 628 15. Poschl, E., et al., *Collagen IV is essential for basement membrane stability but*  
629 *dispensable for initiation of its assembly during early development*. Development, 2004.  
630 **131**(7): p. 1619-28.
- 631 16. Gould, D.B., et al., *Mutations in Col4a1 cause perinatal cerebral hemorrhage and*  
632 *porencephaly*. Science, 2005. **308**(5725): p. 1167-71.
- 633 17. Chioran, A., et al., *Collagen IV trafficking: The inside-out and beyond story*. Dev Biol,  
634 2017.
- 635 18. Qi, Y. and R. Xu, *Roles of PLODs in Collagen Synthesis and Cancer Progression*. Front  
636 Cell Dev Biol, 2018. **6**: p. 66.
- 637 19. Ehling, M., et al., *Notch controls retinal blood vessel maturation and quiescence*.  
638 Development, 2013. **140**(14): p. 3051-61.
- 639 20. Mak, K.M. and R. Mei, *Basement Membrane Type IV Collagen and Laminin: An*  
640 *Overview of Their Biology and Value as Fibrosis Biomarkers of Liver Disease*. Anat Rec  
641 (Hoboken), 2017. **300**(8): p. 1371-1390.
- 642 21. Hohenester, E. and P.D. Yurchenco, *Laminins in basement membrane assembly*. Cell  
643 Adh Migr, 2013. **7**(1): p. 56-63.
- 644 22. Nakatsu, M.N., J. Davis, and C.C. Hughes, *Optimized fibrin gel bead assay for the study*  
645 *of angiogenesis*. J Vis Exp., 2007(3): p. 186. doi: 10.3791/186. Epub 2007 Apr 29.
- 646 23. Lv, P., et al., *Targeted disruption of Rab10 causes early embryonic lethality*. Protein Cell,  
647 2015. **6**(6): p. 463-467.



- 648 24. Gerhardt, H., et al., *VEGF guides angiogenic sprouting utilizing endothelial tip cell*  
649 *filopodia*. J Cell Biol., 2003. **161**(6): p. 1163-77. Epub 2003 Jun 16.
- 650 25. Arima, S., et al., *Angiogenic morphogenesis driven by dynamic and heterogeneous*  
651 *collective endothelial cell movement*. Development, 2011. **138**(21): p. 4763-76.
- 652 26. Boucher, J.M., et al., *Dynamic alterations in decoy VEGF receptor-1 stability regulate*  
653 *angiogenesis*. Nat Commun, 2017. **8**: p. 15699.
- 654 27. Chappell, J.C., et al., *Local guidance of emerging vessel sprouts requires soluble Flt-1*.  
655 Dev Cell., 2009. **17**(3): p. 377-86. doi: 10.1016/j.devcel.2009.07.011.
- 656 28. Jakobsson, L., K. Bentley, and H. Gerhardt, *VEGFRs and Notch: a dynamic*  
657 *collaboration in vascular patterning*. Biochem Soc Trans, 2009. **37**(Pt 6): p. 1233-6.
- 658 29. Sipila, L., et al., *Secretion and assembly of type IV and VI collagens depend on*  
659 *glycosylation of hydroxylysines*. J Biol Chem, 2007. **282**(46): p. 33381-8.
- 660 30. Banushi, B., et al., *Regulation of post-Golgi LH3 trafficking is essential for collagen*  
661 *homeostasis*. Nat Commun, 2016. **7**: p. 12111.
- 662 31. Benedito, R., et al., *The notch ligands Dll4 and Jagged1 have opposing effects on*  
663 *angiogenesis*. Cell, 2009. **137**(6): p. 1124-35.
- 664 32. Roca, C. and R.H. Adams, *Regulation of vascular morphogenesis by Notch signaling*.  
665 Genes Dev, 2007. **21**(20): p. 2511-24.
- 666 33. Ortiz, D., et al., *Ypt32 recruits the Sec4p guanine nucleotide exchange factor, Sec2p, to*  
667 *secretory vesicles; evidence for a Rab cascade in yeast*. J Cell Biol, 2002. **157**(6): p.  
668 1005-15.
- 669 34. Segev, N., *GTPases in intracellular trafficking: an overview*. Semin Cell Dev Biol, 2011.  
670 **22**(1): p. 1-2.
- 671 35. Yoshimura, S., et al., *Family-wide characterization of the DENN domain Rab GDP-GTP*  
672 *exchange factors*. J Cell Biol, 2010. **191**(2): p. 367-81.
- 673 36. Casanova, J.E., et al., *Association of Rab25 and Rab11a with the apical recycling*  
674 *system of polarized Madin-Darby canine kidney cells*. Mol Biol Cell, 1999. **10**(1): p. 47-  
675 61.
- 676 37. Muller, M.P. and R.S. Goody, *Molecular control of Rab activity by GEFs, GAPs and GDI*.  
677 Small GTPases, 2018. **9**(1-2): p. 5-21.
- 678 38. Wang, H., et al., *NOTCH1-RBPJ complexes drive target gene expression through*  
679 *dynamic interactions with superenhancers*. Proc Natl Acad Sci U S A, 2014. **111**(2): p.  
680 705-10.
- 681 39. Gridley, T., *Notch signaling in vascular development and physiology*. Development,  
682 2007. **134**(15): p. 2709-18.
- 683 40. Fidler, A.L., et al., *Collagen IV and basement membrane at the evolutionary dawn of*  
684 *metazoan tissues*. Elife, 2017. **6**.
- 685 41. Arroyo, A.G. and M.L. Iruela-Arispe, *Extracellular matrix, inflammation, and the*  
686 *angiogenic response*. Cardiovasc Res, 2010. **86**(2): p. 226-35.
- 687 42. English, A.R. and G.K. Voeltz, *Rab10 GTPase regulates ER dynamics and morphology*.  
688 Nat Cell Biol, 2013. **15**(2): p. 169-78.
- 689 43. Karunanithi, S., et al., *A Rab10:Ra1A G protein cascade regulates insulin-stimulated*  
690 *glucose uptake in adipocytes*. Mol Biol Cell, 2014. **25**(19): p. 3059-69.
- 691 44. Siekmann, A.F. and N.D. Lawson, *Notch signalling limits angiogenic cell behaviour in*  
692 *developing zebrafish arteries*. Nature, 2007. **445**(7129): p. 781-4.
- 693 45. Lee, S., et al., *Processing of VEGF-A by matrix metalloproteinases regulates*  
694 *bioavailability and vascular patterning in tumors*. J Cell Biol, 2005. **169**(4): p. 681-91.
- 695 46. Blanco, R. and H. Gerhardt, *VEGF and Notch in tip and stalk cell selection*. Cold Spring  
696 Harb Perspect Med, 2013. **3**(1): p. a006569.
- 697 47. Hellstrom, M., et al., *Dll4 signalling through Notch1 regulates formation of tip cells during*  
698 *angiogenesis*. Nature, 2007. **445**(7129): p. 776-80.

- 699 48. Estrach, S., et al., *Laminin-binding integrins induce Dll4 expression and Notch signaling*  
700 *in endothelial cells*. *Circ Res*, 2011. **109**(2): p. 172-82.
- 701 49. Stenzel, D., et al., *Endothelial basement membrane limits tip cell formation by inducing*  
702 *Dll4/Notch signalling in vivo*. *EMBO reports*, 2011. **12**(11): p. 1135-1143.
- 703 50. Mouillesseaux, K.P., et al., *Notch regulates BMP responsiveness and lateral branching*  
704 *in vessel networks via SMAD6*. *Nat Commun*, 2016. **7**: p. 13247.
- 705

## FIGURES

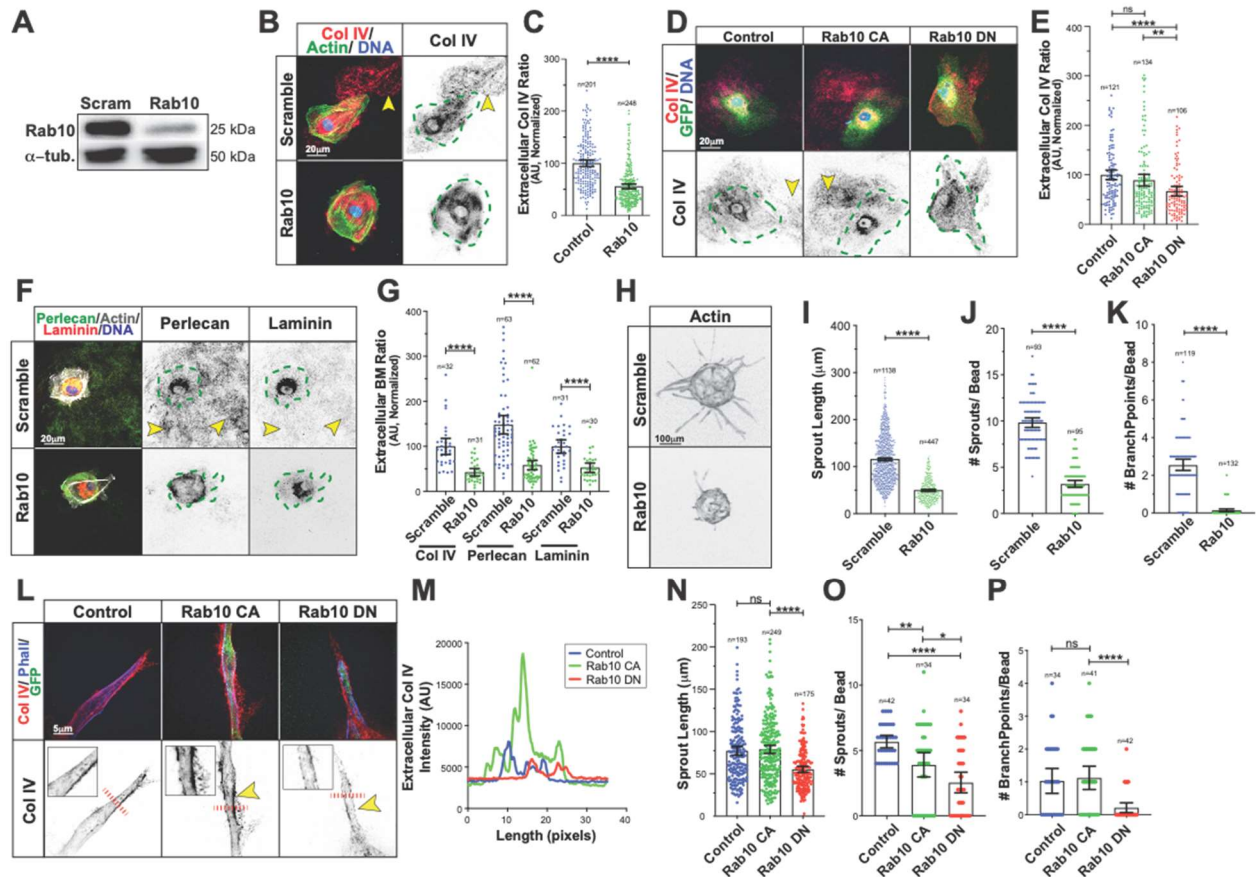

706 **Figure 1. Loss of Rab10 impairs endothelial basement membrane secretion.**  
 707 (A) Immunoblot of Rab10 in ECs transfected with either scramble or Rab10 siRNA and probed for  
 708 indicated proteins. (B) Representative images of scramble or Rab10 siRNA-treated ECs and stained for  
 709 collagen IV (Col IV) (red), actin (green), and DNA (blue). Dotted green line indicates cell outline.  
 710 Arrowheads denote extracellular Col IV secretion. (C) Graph of extracellular Col IV ratio in scramble or  
 711 Rab10 siRNA-treated ECs. n = number of ECs. (D) Representative image of ECs expressing GFP only  
 712 (control), GFP-Rab10 constitutively active (CA) or GFP-Rab10 dominant negative (DN), stained for  
 713 collagen IV (red) and DNA (blue). Dotted green line indicates cell outline. Arrowheads denote  
 714 extracellular Col IV secretion. (E) Graph of extracellular Col IV ratio in ECs expressing GFP only (control)  
 715 or GFP Rab10 CA/DN. n=number of ECs. (F) Representative images of scramble or Rab10 siRNA-  
 716 treated ECs and stained for laminin (red) perlecan (green), actin (grey), and DNA (blue). Dotted green  
 717 line indicates cell outline. Arrowheads denote extracellular Col IV secretion. (G) Graph of extracellular  
 718 basement membrane (BM) ratio in scramble or Rab10 siRNA-treated ECs between indicated secreted  
 719 proteins. n=number of ECs. (H) Representative image of fibrin-bead sprouts between indicated siRNA  
 720 treatment groups. Sprouts were stained for actin (grey) to delineate sprout morphology. (J-K) Graphs of  
 721 sprouting parameters for scramble or Rab10 siRNA-treated sprouts. n=number of measurements. (L)  
 722 Representative images of ECs expressing GFP only (control), GFP-Rab10 CA or GFP-Rab10 DN in  
 723 fibrin-bead sprouts. Dotted red line indicates line scan of (m). Arrowheads denote extracellular Col IV  
 724 secretion. (M) Line scan measurement of Col IV fluorescence intensity shown in (L), dotted red lines. (N-  
 725 P) Graphs of sprouting parameters for GFP only (control) or GFP-Rab10 CA/DN expressing sprouts.  
 726 n=number of measurements. For all experiments, data are represented as mean  $\pm$  95% confidence  
 727 intervals. Black bars indicate comparison groups with indicated p-values. All p-values are from two-tailed  
 728 Student's t-test from at least three experiments. \* $p \leq 0.05$ ; \*\* $p \leq 0.01$ ; \*\*\* $p \leq 0.001$ ; \*\*\*\* $p \leq 0.0001$ ; ns, not  
 729 significant.

730

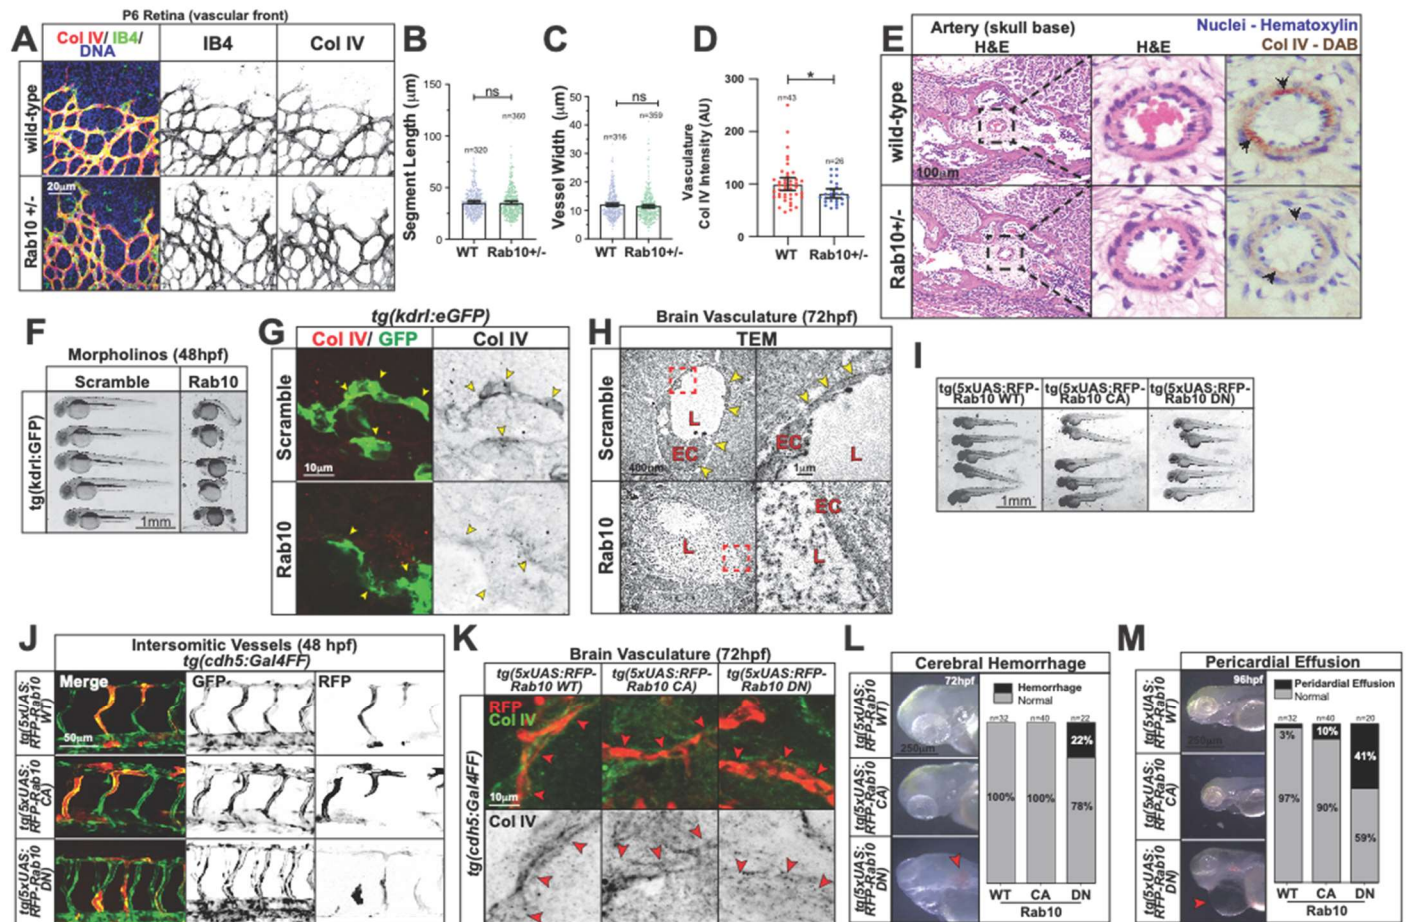

731  
732  
733  
734  
735  
736  
737  
738  
739  
740  
741  
742  
743  
744  
745  
746  
747  
748  
749  
750  
751  
752  
753  
754  
755

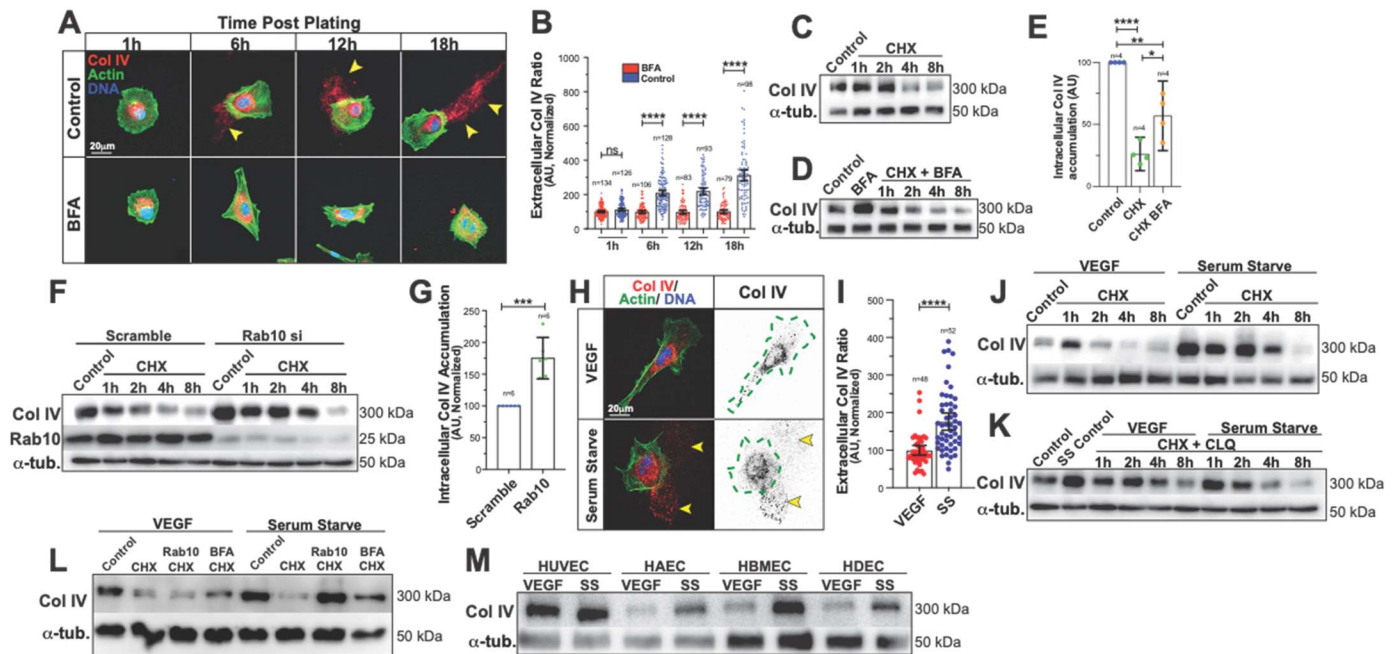

756 **Figure 3. Rab10 influences intracellular Col IV protein stability.**  
 757 (A) Representative images of ECs treated with brefeldin A (BFA) and fixed at indicated time points after  
 758 BFA exposure. Cells were stained for Col IV (red), actin (green), and DNA (blue). Arrowheads denote  
 759 extracellular Col IV secretion. (B) Graph of extracellular Col IV ratio in control or BFA-treated ECs at  
 760 indicated time points after BFA exposure. (C) Immunoblot of Col IV in ECs treated with cycloheximide  
 761 (CHX) (20mg/ml) and probed for indicated proteins. (D) Immunoblot of Col IV in ECs treated with both  
 762 CHX and BFA. (E) Graph of Col IV protein accumulation in ECs treated with CHX, and CHX with BFA.  
 763 Col IV accumulations were normalized to  $\alpha$ -tubulin levels. (F) Immunoblot of Col IV in ECs transfected  
 764 with either scramble or Rab10 siRNA and treated with CHX. EC lysate probed for indicated proteins. (G)  
 765 Graph of Col IV levels in ECs transfected with either scramble or Rab10 siRNA and treated with CHX. Col  
 766 IV accumulations were normalized to  $\alpha$ -tubulin levels. (H) Representative images of ECs cultured in  
 767 VEGF-containing or serum starve (SS) media and stained for collagen IV (red), actin (green), and DNA  
 768 (blue). Dotted green line indicates cell outline. Arrowheads denote extracellular Col IV secretion. (I) Graph  
 769 of extracellular Col IV ratio of ECs cultured in VEGF-containing or SS media. (J) Immunoblot of Col IV in  
 770 ECs cultured in VEGF-containing or SS media treated with CHX at indicated time points and probed for  
 771 indicated proteins. (K) Immunoblot of Col IV in ECs cultured in VEGF-containing or SS media treated with  
 772 CHX and chloroquine (CLQ) (10 $\mu$ M) at indicated time points and probed for indicated proteins. (L)  
 773 Immunoblot of Col IV in ECs transfected with either scramble or Rab10 siRNA and cultured in VEGF-  
 774 containing or SS media treated with CHX and/or BFA for 8 hrs and probed for indicated proteins. (M)  
 775 Immunoblot of Col IV in various ECs (HUVECs, HAECs, HBMECs, and HDECs) cultured in either VEGF-  
 776 containing or SS media and probed for indicated proteins. For all experiments, data are represented as  
 777 mean  $\pm$  95% confidence intervals. Black bars indicate comparison groups with indicated p-values. All p-  
 778 values are from two-tailed Student's t-test from at least three experiments. \*p $\leq$ 0.05; \*\*p $\leq$ 0.01;  
 779 \*\*\*p $\leq$ 0.001; \*\*\*\*p $\leq$ 0.0001; ns, not significant.  
 780

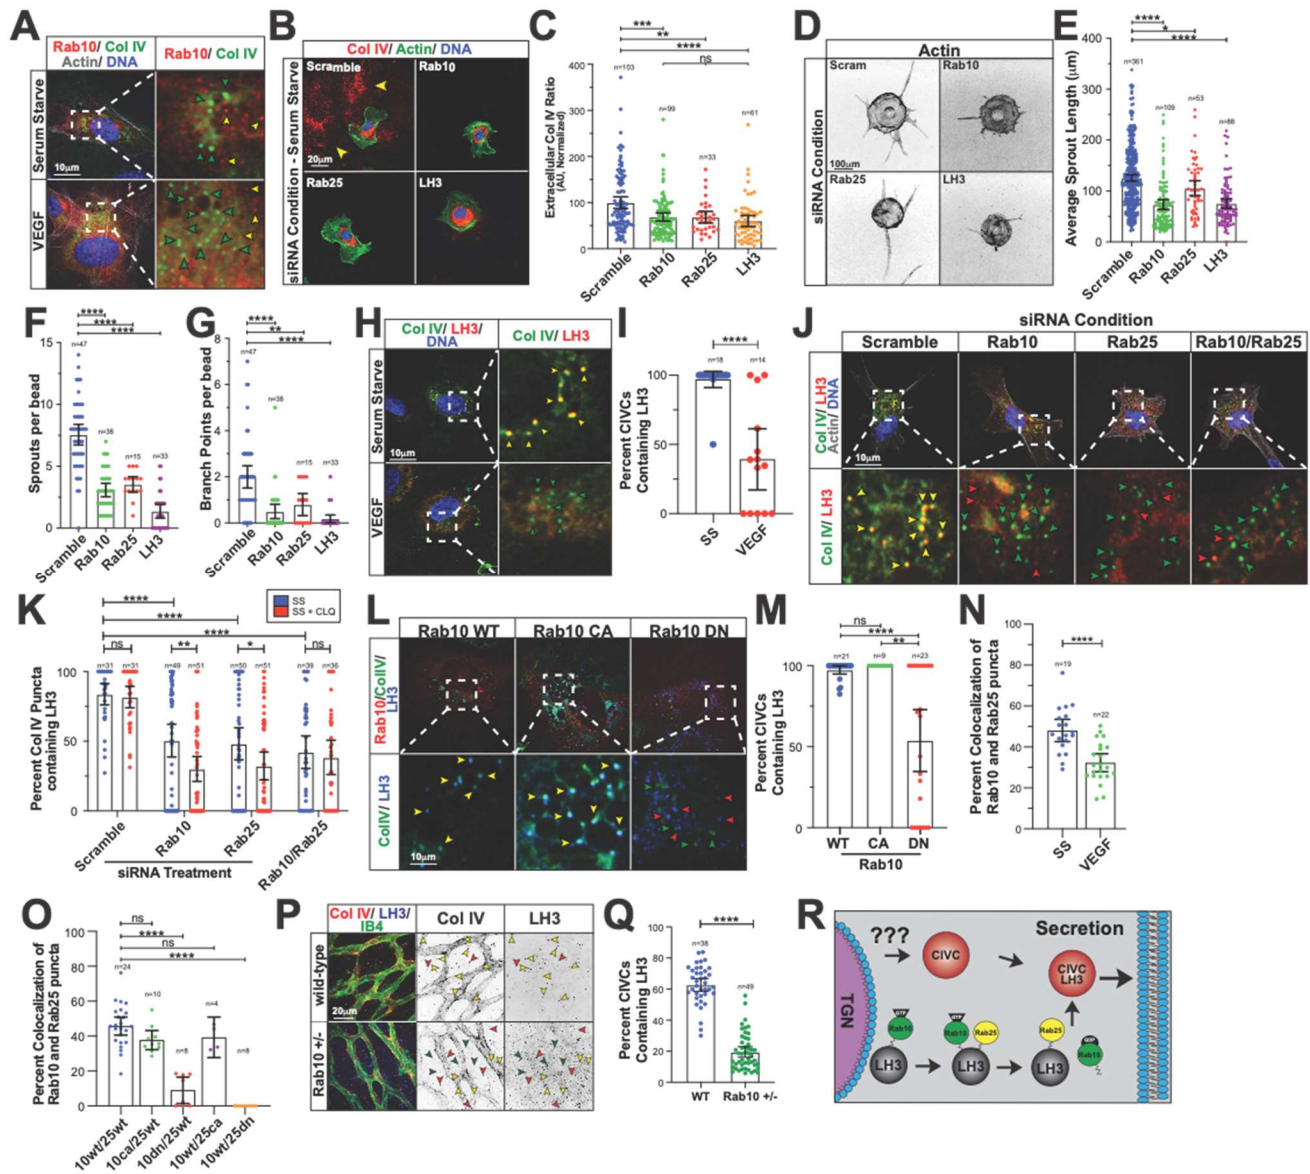

781 **Figure 4. Rab10 and Rab25 work in combination to traffic LH3 to CIVCs.**

782 (A) Representative images of ECs expressing RFP-Rab10 WT and stained for Col IV (green). Green  
783 arrowheads indicate CIVCs only and yellow arrowheads indicate Rab10 puncta only. (B) Representative  
784 images of scramble, Rab10, Rab25, or LH3 siRNA-treated ECs and stained for Col IV (red), actin (green),  
785 and DNA (blue). Arrowheads denote extracellular Col IV secretion. (C) Graph of extracellular Col IV ratio  
786 of scramble, Rab10, Rab25, or LH3 siRNA-treated ECs cultured in SS media. (D) Representative images  
787 of fibrin-bead sprouts between indicated siRNA treatment groups. Sprouts were stained for actin (grey) to  
788 delineate sprout morphology. (E-G) Graphs of sprouting parameters for scramble, Rab10, Rab25, or LH3  
789 siRNA-treated sprouts. (H) Representative images of ECs cultured in VEGF-containing or SS media and  
790 stained for Col IV (green), LH3 (red), and DNA (blue). Green arrowheads indicate CIVCs only and yellow  
791 arrowheads indicate co-localized puncta. (I) Graph of percent CIVC vesicles co-localized with LH3 in ECs  
792 cultured in VEGF-containing or SS media. (J) Representative images of scramble, Rab10, Rab25, or both  
793 Rab10/25 siRNA-treated ECs and stained for Col IV (green), LH3 (red), actin (grey), and DNA (blue).  
794 Yellow arrowheads indicate co-localized puncta only, green arrowheads indicate Col IV only puncta, and  
795 red arrowheads indicate LH3 puncta only. (K) Graph of percent CIVC vesicles co-localized with LH3 in  
796 scramble, Rab10, Rab25, or LH3 siRNA-treated conditions cultured in SS media or SS media with CLQ  
797 (10µM). (L) Representative images of ECs expressing RFP-Rab10 WT, CA, DN, stained for Col IV

798 (green) and LH3 (blue). Yellow arrowheads indicate co-localized puncta only, green arrowheads indicate  
799 Col IV puncta, and red arrowheads indicate LH3 puncta. (M) Graph of percent CIVC vesicles co-localized  
800 with LH3 in ECs expressing RFP-Rab10 WT, CA or DN. (N) Graph of percent Rab10 puncta co-localized  
801 with Rab25 in either VEGF containing or SS media. (O) Graph of percent Rab10 puncta co-localized with  
802 Rab25 in ECs transfected with indicated constructs. (P) Representative images of WT or Rab10<sup>+/-</sup> mice  
803 retinas harvested at P6. Retinas were stained for Col IV (red), LH3 (blue) and IB4 (green) to identify blood  
804 vessels. (Q) Graph of percent CIVCs containing LH3 in WT or Rab10<sup>+/-</sup> P6 mouse retinas. (R) Schematic  
805 diagram showing how Rab10 and Rab25 function to coordinate delivery of LH3 to CIVCs for proper  
806 secretion of Col IV. Trans-Golgi network (TGN). For all experiments, data are represented as mean ±  
807 95% confidence intervals. Black bars indicate comparison groups with indicated p-values. All p-values are  
808 from two-tailed Student's t-test from at least three experiments. \*p≤0.05; \*\*p≤0.01; \*\*\*p≤0.001;  
809 \*\*\*\*p≤0.0001; ns, not significant.

810  
811  
812  
813  
814  
815  
816  
817  
818  
819  
820

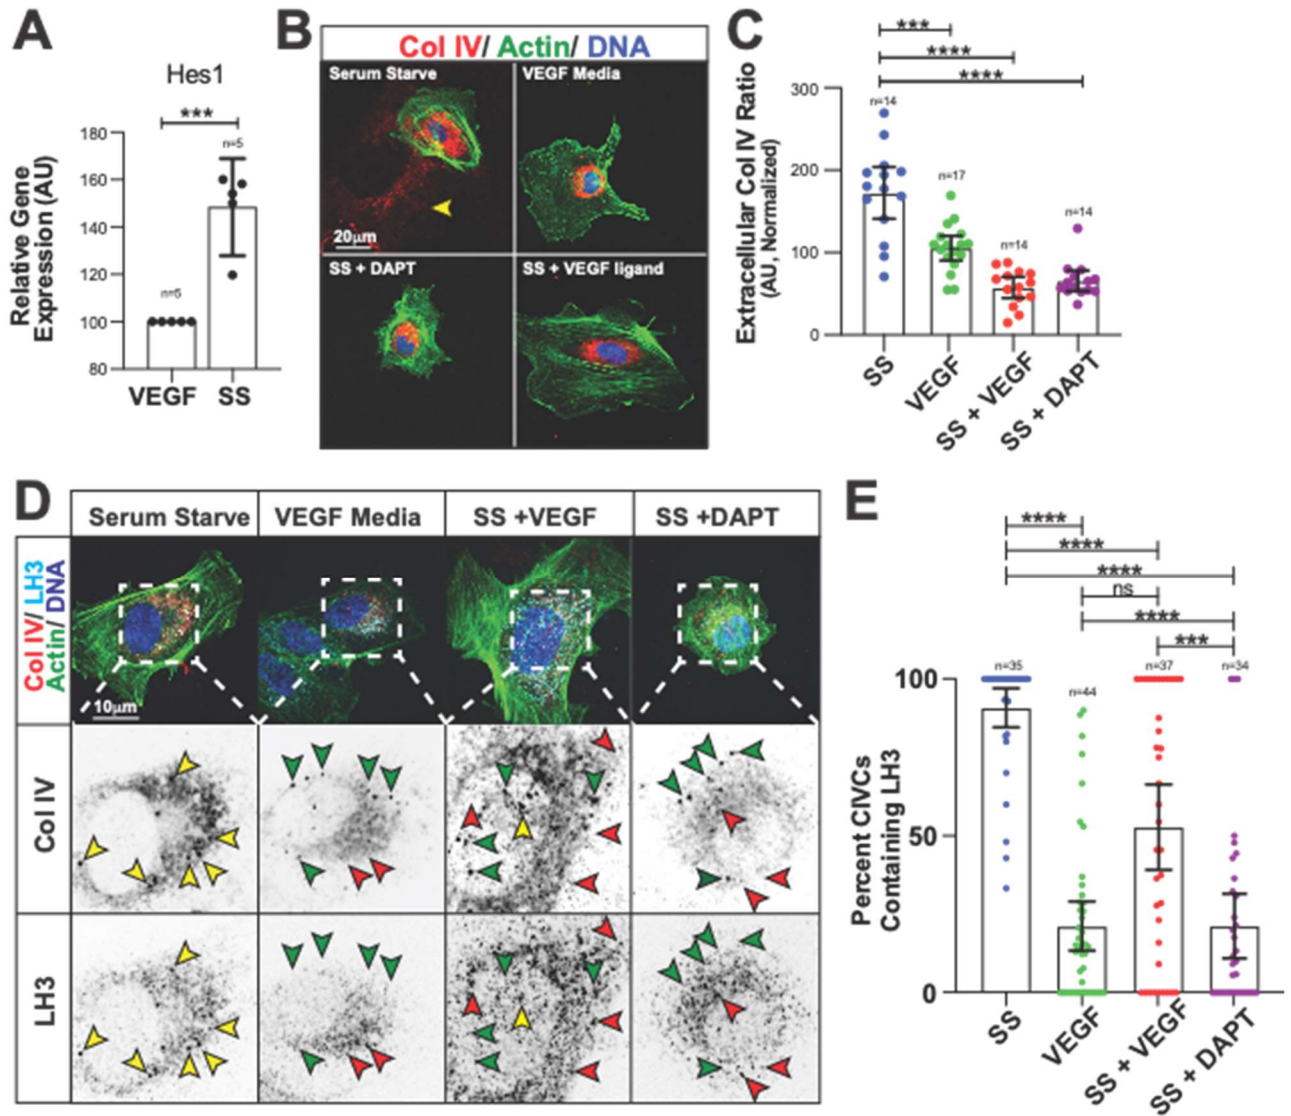

821 **Figure 5. Notch signaling regulated LH3 trafficking.**

822 (A) Graph of relative *Hes1* gene expression in ECs cultured in VEGF-containing or SS media. Gene  
 823 expression levels normalized to GAPDH. (B) Representative images of ECs cultured in VEGF-containing,  
 824 SS media, SS media + VEGF ligand, or SS media + DAPT and stained for Col IV (red), actin (green), and  
 825 DNA (blue). Arrowhead denotes extracellular Col IV secretion. (C) Graph of extracellular Col IV ratio of  
 826 ECs cultured in VEGF-containing, SS media, SS media + VEGF ligand, or SS media + DAPT. (D)  
 827 Representative images of ECs cultured in VEGF-containing, SS media, SS media + VEGF ligand, or SS  
 828 media + DAPT and stained for Col IV (red), LH3 (light blue), actin (green), and DNA (blue). Yellow  
 829 arrowheads indicate co-localized puncta only, green arrowheads indicate Col IV only puncta, and red  
 830 arrowheads indicate LH3 puncta only. (E) Graph of percent CIVC vesicles co-localized with LH3 in VEGF-  
 831 containing, SS media, SS media + VEGF ligand, or SS media + DAPT conditions. For all experiments,  
 832 data are represented as mean  $\pm$  95% confidence intervals. Black bars indicate comparison groups with  
 833 indicated p-values. All p-values are from two-tailed Student's t-test from at least three experiments.  
 834 \* $p \leq 0.05$ ; \*\* $p \leq 0.01$ ; \*\*\* $p \leq 0.001$ ; \*\*\*\* $p \leq 0.0001$ ; ns, not significant.

835  
 836



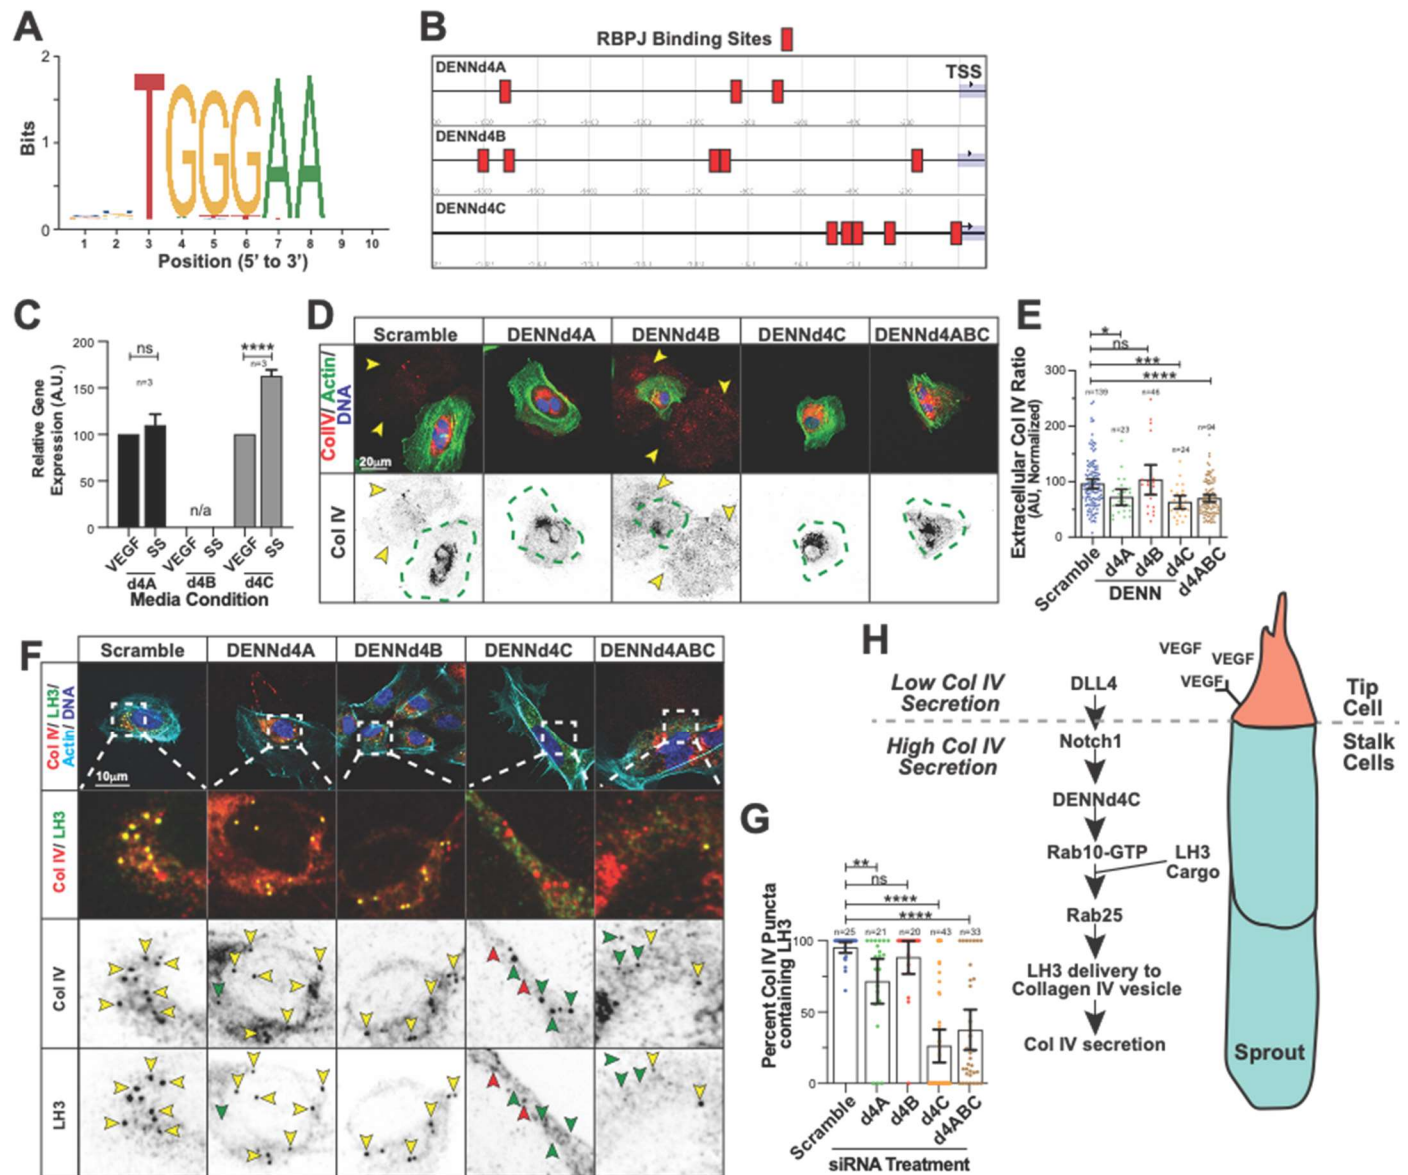

837 **Figure 6. Notch signaling regulated Rab10 GTPase activity through DENND4C.**

838 (A) Predicted RBPJ binding site sequences, identified by the Transfac CSL consensus matrix. (B)

839 Schematic showing RBPJ binding sites upstream of DENND4A (top), DENND4B (middle), and DENND4C

840 (bottom) genes. TSS, transcription start site. (C) Graph of relative gene expression of *dennd4A*, *dennd4B*,

841 *dennd4C* in ECs cultured in VEGF-containing or SS media. Gene expression levels normalized to

842 GAPDH. (D) Representative images of scramble, DENND4A, DENND4B, DENND4C, or triplicate siRNA

843 treated ECs stained for Col IV (red), actin (green), and DNA (blue). Dotted green line indicates cell

844 outline. Arrowheads denote extracellular Col IV secretion. (E) Graph of extracellular Col IV ratio in

845 scramble, DENND4A, DENND4B, DENND4C, or triplicate siRNA-treated ECs. (F) Representative images

846 of scramble, DENND4A, DENND4B, DENND4C, or triplicate siRNA-treated ECs stained for Col IV (red),

847 LH3 (green), actin (light blue), and DNA (blue). Yellow arrowheads indicate co-localized puncta only,

848 green arrowheads indicate Col IV only puncta, and red arrowheads indicate LH3 puncta only. (G) Graph

849 of percent CIVCs containing LH3 in scramble, DENND4A, DENND4B, DENND4C, or triplicate siRNA-

850 treated ECs. (H) Schematic diagram of how VEGF signals the tip cell leads to a series of signaling events

851 resulting in the secretion of Col IV from stalk cells. For all experiments, data are represented as mean  $\pm$

852 95% confidence intervals. Black bars indicate comparison groups with indicated p-values. All p-values are  
853 from two-tailed Student's t-test from at least three experiments. \* $p \leq 0.05$ ; \*\* $p \leq 0.01$ ; \*\*\* $p \leq 0.001$ ;  
854 \*\*\*\* $p \leq 0.0001$ ; ns, not significant.  
855

856 SUPPLEMENTAL FIGURES

857  
858  
859  
860  
861  
862  
863  
864  
865  
866  
867  
868  
869  
870  
871  
872  
873  
874  
875  
876  
877  
878  
879  
880  
881  
882  
883  
884  
885  
886  
887  
888  
889  
890  
891  
892  
893  
894  
895  
896  
897  
898  
899  
900  
901  
902  
903  
904  
905

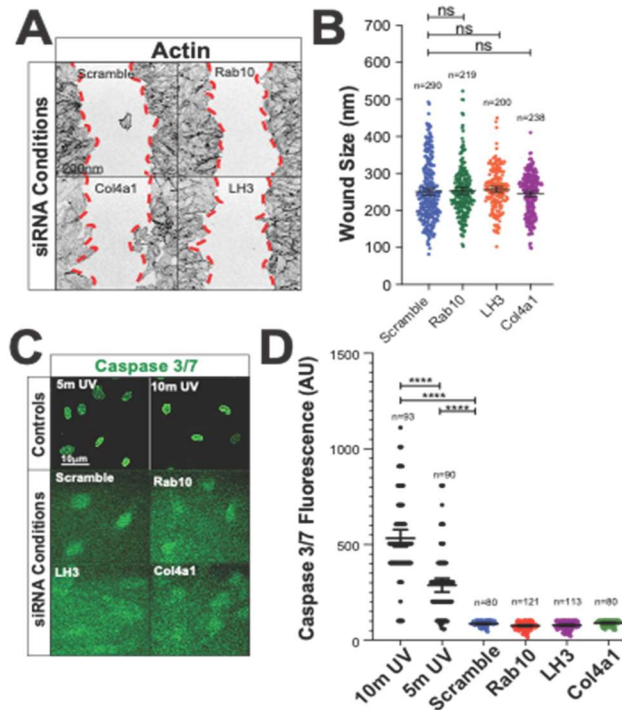

**Supplemental Figure 1. Effect of transfection on EC viability markers.**

(A) Representative images of scramble, Rab10, lysyl hydroxylase 3 (LH3), and Col IV (col4a1) siRNA treated ECs in scratch wound assay. Cells were stained for actin (grey) to delineate scratch wound margins. Dotted red line indicates wound border. (B) Graph of average wound size in indicated groups of indicated siRNA-treated ECs. n=number of measurements. (C) Representative images of scramble, Rab10, lysyl hydroxylase 3 (LH3), and Col IV (col4a1) siRNA-treated ECs stained for Caspase 3/7 activation (green). Controls were subjected to UV light exposure for indicated times to elicit caspase activation. (D) Graph of Caspase 3/7 activation fluorescence intensity in ECs treated with indicated siRNA treatment groups. Measurement of GFP fluorescence intensity within the nuclei of ECs. n=number of cells. For all experiments, data are represented as mean  $\pm$  95% confidence intervals. Black bars indicate comparison groups with indicated p-values. All p-values are from two-tailed Student's t-test from duplicate experiments. \* $p \leq 0.05$ ; \*\* $p \leq 0.01$ ; \*\*\* $p \leq 0.001$ ; \*\*\*\* $p \leq 0.0001$ ; ns, not significant.

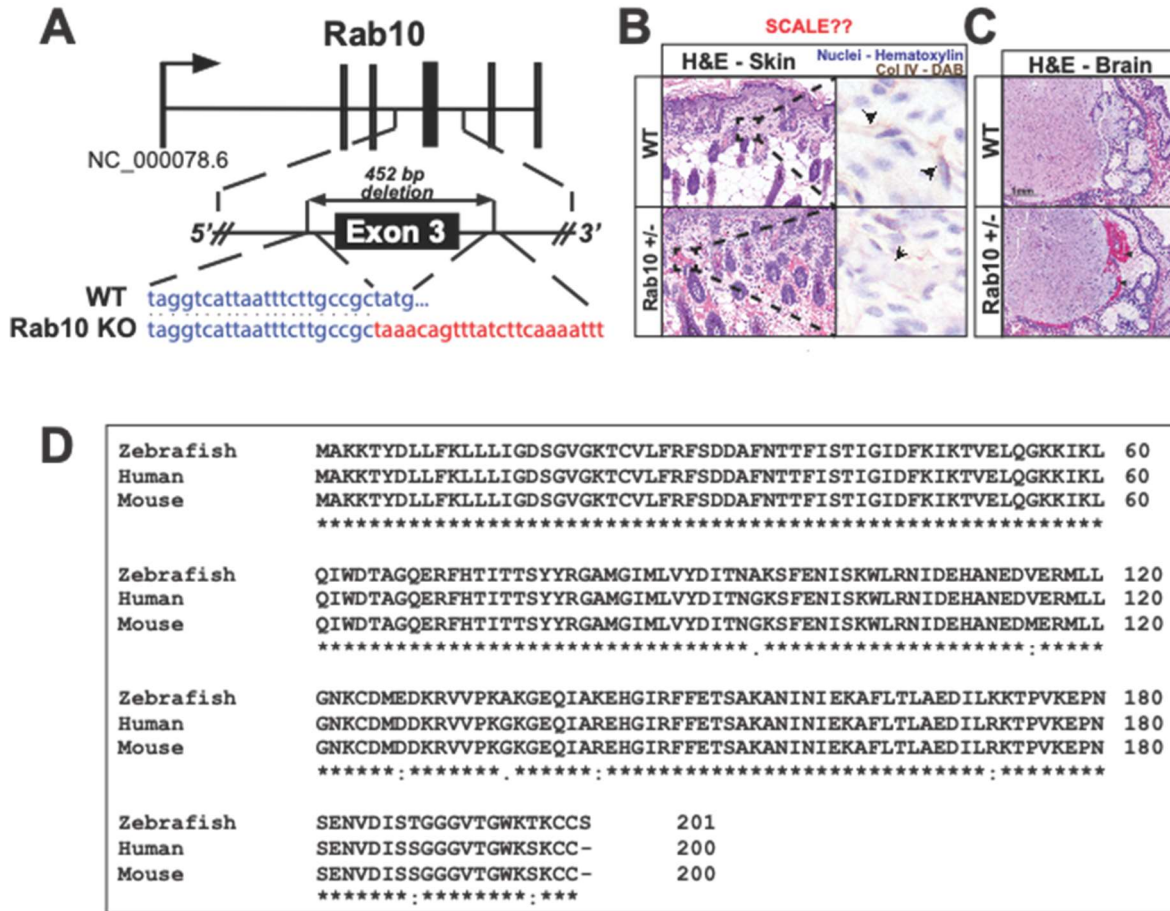

906 **Supplemental Figure 2. Rab10 influences Col IV bioavailability *in vivo*. SCALE BAR B?**  
 907 (A) Schematic diagram of the CRISPR mediated *rab10* knockout mouse from Jackson Laboratories. A  
 908 452-bp deletion was cloned at exon 3 resulting in an early truncation. (B) Hematoxylin and eosin (H&E)  
 909 stained skin slices from P6 wild-type or *Rab10*<sup>+/-</sup> mice. Collagen IV stained with DAB (3-3'  
 910 diaminobenzidine) indicated by arrowheads. (C) Hematoxylin and eosin (H&E) stained brain slices from  
 911 wild-type or *Rab10*<sup>+/-</sup> mice. Arrowheads indicate intracranial/cerebral hemorrhage (bottom). (D) Alignment  
 912 of *rab10* from human, zebrafish, and mouse.

913  
 914  
 915  
 916  
 917  
 918  
 919  
 920  
 921  
 922  
 923  
 924

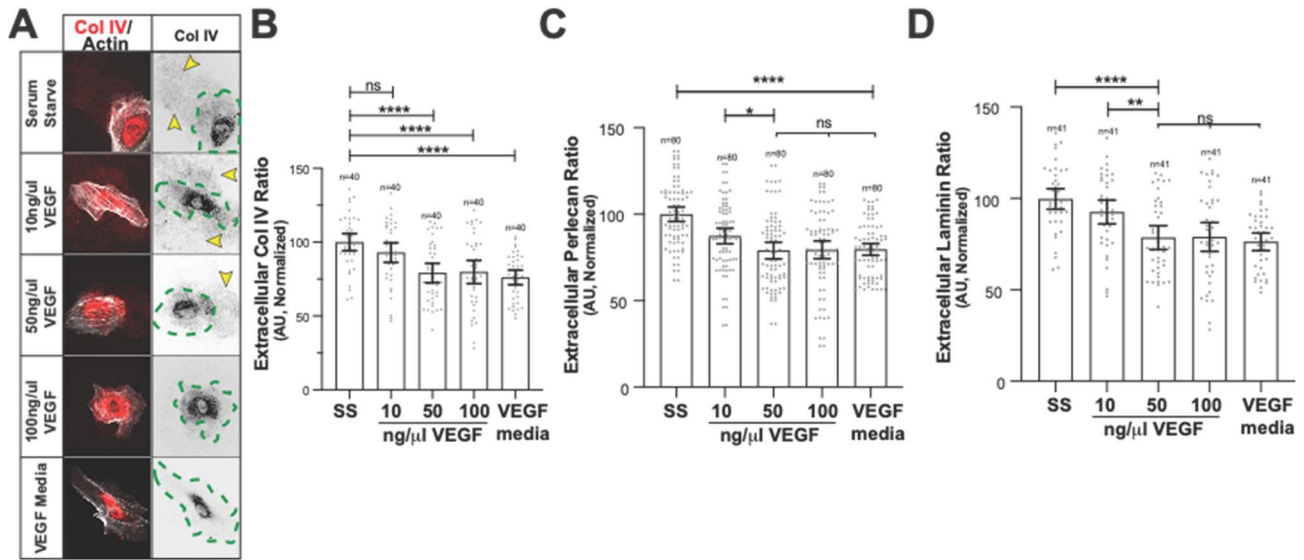

925  
 926 **Supplemental Figure 3. Effect of VEGF on basement membrane secretion in HUVECs.**  
 927 (A) Representative images of ECs cultured in VEGF-containing, SS media, or SS media supplemented  
 928 with indicated concentrations of VEGF ligand. ECs were stained for collagen IV (red) and actin (grey).  
 929 Dotted green line indicates cell outline. Arrowheads denote extracellular Col IV secretion. (B) Graph of  
 930 extracellular Col IV ratio in ECs. (C) Graph of extracellular perlecan ratio in ECs. (D) Graph of  
 931 extracellular laminin ratio in ECs. For all experiments, data represented as mean  $\pm$  95% confidence  
 932 intervals. Black bars indicate comparison groups with indicated p-values. All p-values are from two-tailed  
 933 Student's t-test from at least three experiments. \* $p \leq 0.05$ ; \*\* $p \leq 0.01$ ; \*\*\* $p \leq 0.001$ ; \*\*\*\* $p \leq 0.0001$ ; ns, not  
 934 significant.

935  
 936  
 937  
 938  
 939  
 940  
 941  
 942  
 943  
 944  
 945  
 946  
 947  
 948  
 949  
 950  
 951  
 952  
 953  
 954

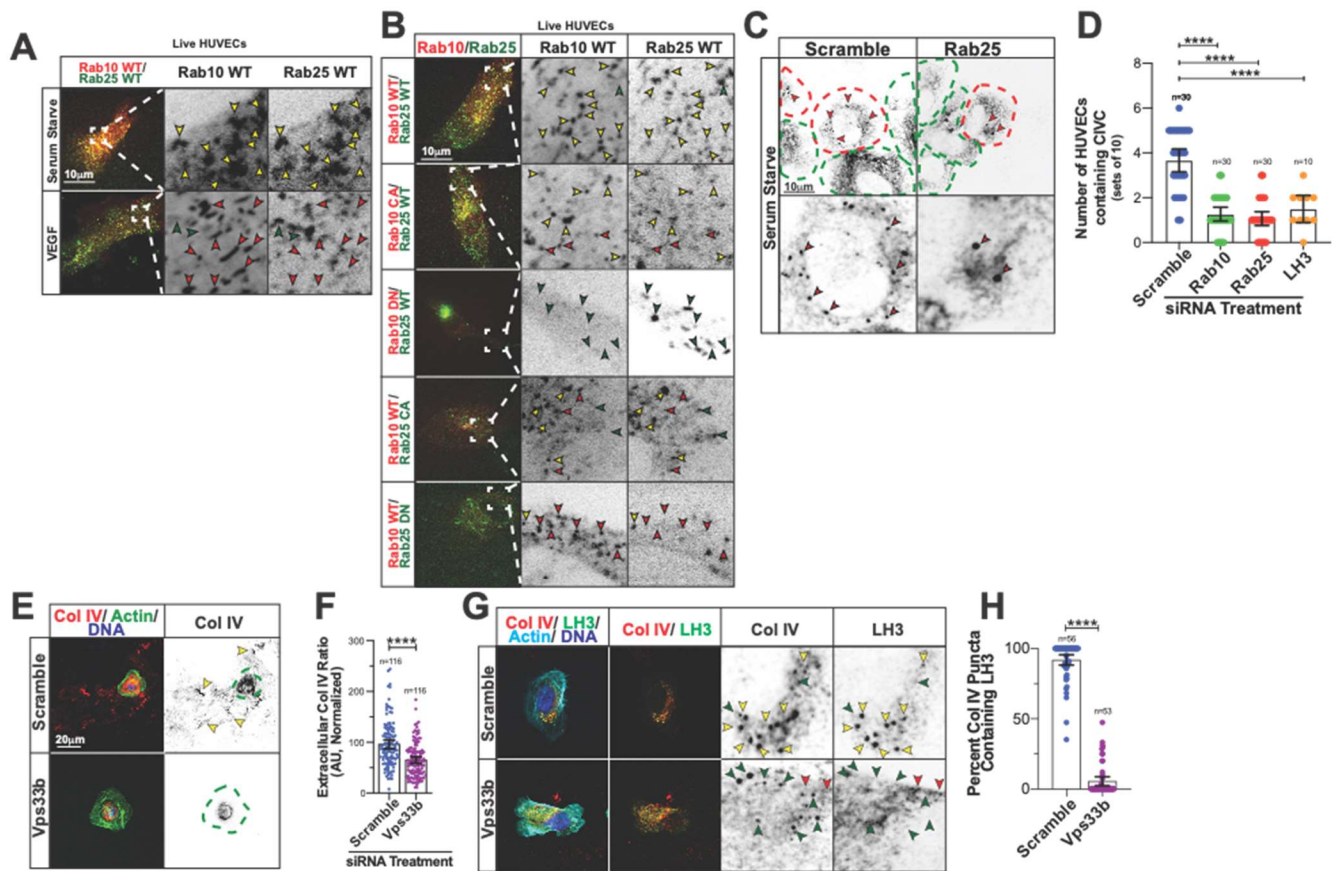

955 **Supplemental Figure 4. Rab10 and Rab25 work in combination to traffic LH3 to CIVCs.**  
 956 (A) Representative images of ECs co-expressing RFP-Rab10 WT and BFP-Rab25 WT in VEGF  
 957 containing either VEGF-containing or SS media Yellow arrowheads denote co-localized Rab10 and  
 958 Rab25 puncta, red arrowheads denote Rab10 puncta only, and green arrowheads denote Rab25 puncta  
 959 only. (B) Representative images of ECs transfected to co-expression RFP-Rab10 WT, CA or DN and  
 960 BFP-Rab25 WT, CA or DN cultured in SS media. Yellow arrowheads denote co-localized Rab10 and  
 961 Rab25 puncta, red arrowheads denote Rab10 puncta only, and green arrowheads denote Rab25 puncta  
 962 only. (C) Representative images of scramble and Rab25 siRNA-treated ECs cultured in SS media and  
 963 stained for Col IV (grey). Dotted red and green lines indicates CIVC vesicle positive or negative ECs,  
 964 respectively. Arrowheads denote CIVC vesicles. (D) Graph of number of ECs containing CIVC vesicles in  
 965 scramble, Rab10, Rab25, and LH3 siRNA-treated ECs cultured in SS media. (E) Representative images  
 966 of ECs transfected with either scramble or Vps33b siRNA and stained for Col IV (red), actin (green), and  
 967 DNA (blue). Dotted green line indicates cell outline. Arrowheads denote extracellular Col IV secretion. (F)  
 968 Graph of extracellular Col IV ratio of indicated siRNA treated ECs. n, number of measurements. (G)  
 969 Representative images of ECs transfected with either scramble or Vps33b siRNA and stained for Col IV  
 970 (red), LH3 (green), actin (light blue), and DNA (blue). Yellow arrowheads indicate co-localized puncta  
 971 only, green arrowheads indicate Col IV only puncta, and red arrowheads indicate LH3 puncta only. (H)  
 972 Graph of percent CIVCs containing LH3 in scramble or Vps33b-siRNA treated ECs. For all experiments,  
 973 data are represented as mean  $\pm$  95% confidence intervals. Black bars indicate comparison groups with  
 974 indicated p-values. All p-values are from two-tailed Student's t-test from at least three experiments.  
 975 \* $p \leq 0.05$ ; \*\* $p \leq 0.01$ ; \*\*\* $p \leq 0.001$ ; \*\*\*\* $p \leq 0.0001$ ; ns, not significant.  
 976  
 977

978  
979  
980  
981  
982  
983  
984  
985  
986  
987  
988  
989  
990  
991  
992  
993  
994  
995  
996  
997  
998  
999  
1000  
1001  
1002  
1003  
1004

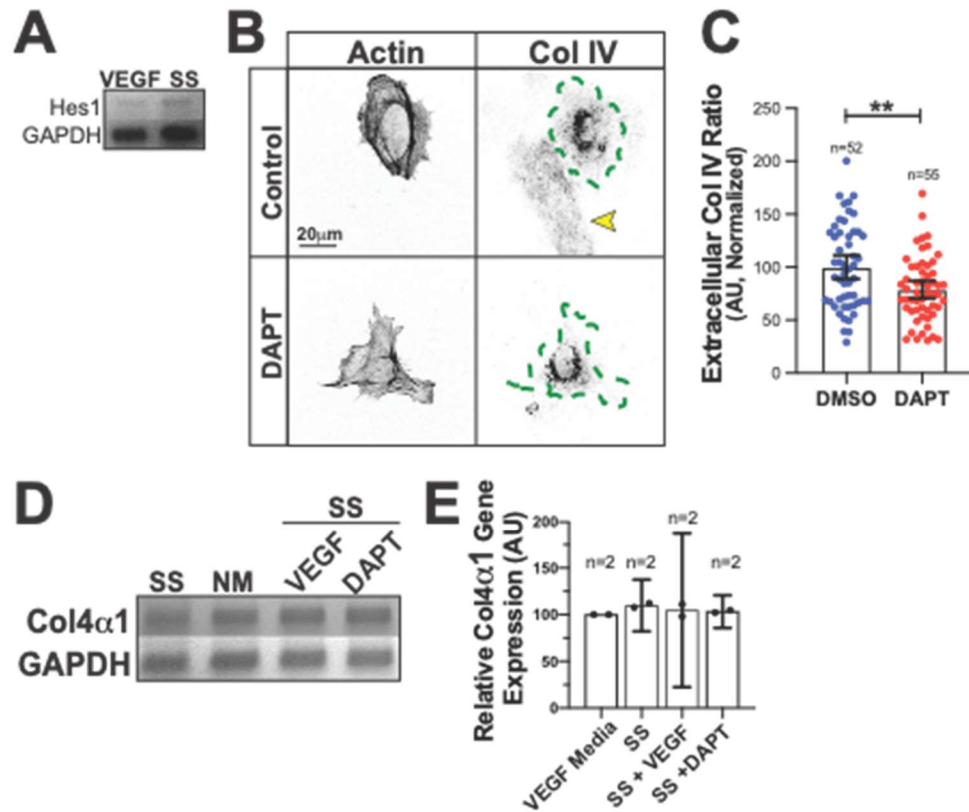

1005 **Supplemental Figure 5. Notch signaling regulated LH3 trafficking.** (A) Representative image of *hes1*  
1006 gene expression ECs cultured in VEGF containing or SS media examined by RT-PCR. Gene expression  
1007 levels normalized to GAPDH. (B) Representative images of ECs cultured in SS media with either DMSO  
1008 (control) or DAPT and stained for actin (left) and Col IV (right). Dotted green line indicates cell outline.  
1009 Arrowheads denote extracellular Col IV secretion. (C) Graph of extracellular Col IV ratio of ECs cultured  
1010 in SS media with either DMSO (control) or DAPT. (D,E) Representative RT-PCR ad graph of Col4a1  
1011 expression between indicated groups. n= number of experiments. For all experiments, data are  
1012 represented as mean  $\pm$  95% confidence intervals. Black bars indicate comparison groups with indicated  
1013 p-values. All p-values are from two-tailed Student's t-test from at least three experiments. \* $p \leq 0.05$ ;  
1014 \*\* $p \leq 0.01$ ; \*\*\* $p \leq 0.001$ ; \*\*\*\* $p \leq 0.0001$ ; ns, not significant.

1015  
1016  
1017  
1018  
1019  
1020  
1021  
1022  
1023

1024  
1025  
1026  
1027  
1028  
1029  
1030  
1031  
1032  
1033  
1034  
1035  
1036  
1037  
1038  
1039  
1040  
1041  
1042  
1043  
1044  
1045  
1046  
1047  
1048  
1049  
1050  
1051  
1052  
1053  
1054  
1055  
1056  
1057  
1058  
1059  
1060  
1061  
1062  
1063  
1064  
1065  
1066  
1067  
1068  
1069  
1070

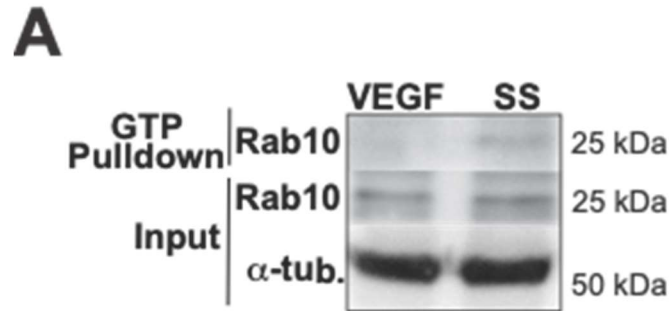

**Supplemental Figure 6. Effect of Vps33b siRNA on Col IV secretion in ECs.**

(A) Immunoblot of glutathione-bead pulldowns from ECs expressing endogenous Rab10 cultured in either VEGF containing or SS media.



1071  
1072  
1073  
1074  
1075
